# Supplementary material for: Biotransformation of (−)-α-Bisabolol by Absidia coerulea
Source: Molecules. 2022 Jan 27;27(3):881. doi: 10.3390/molecules27030881 (PMC8840173; doi:10.3390/molecules27030881)
Supplement: Supplementary file 1 [file molecules-27-00881-s001.zip › molecules-1559459-supplementary.pdf]

## Article

# Biotransformation of (–)- $\alpha$ -Bisabolol by *Absidia coerulea*

Jisu Park <sup>†,‡</sup>, Fubo Han <sup>‡</sup> and Ik-Soo Lee <sup>\*</sup>

College of Pharmacy, Chonnam National University, Gwangju 61186, Korea; qkrwltn9410@naver.com (J.P.); hanfubo0306@gmail.com (F.H.)

<sup>\*</sup> Correspondence: islee@chonnam.ac.kr; Tel.: +82-62-530-2932

<sup>†</sup> Current address: Advanced Radiation Technology Institute, Korea Atomic Energy Research Institute, Jeongeup-si 56212, Korea

<sup>‡</sup> These authors contributed equally to this work.

**Table S1.** Screening for the microorganisms that transform (–)- $\alpha$ -bisabolol (**1**).

| Microorganism                         | Capability <sup>*</sup> | Microorganism                                | Capability <sup>*</sup> |
|---------------------------------------|-------------------------|----------------------------------------------|-------------------------|
| <i>A. alternata</i>                   | -                       | <i>H. resiniae</i>                           | -                       |
| <i>A. coerulea</i>                    | +++                     | <i>K. marxianus</i>                          | -                       |
| <i>A. fumigatus</i>                   | +                       | <i>M. hiemalis</i>                           | ++                      |
| <i>C. elegans</i> var. <i>elegans</i> | ++                      | <i>M. lacticum</i>                           | -                       |
| <i>F. neoformans</i>                  | -                       | <i>M. ramanniana</i> var. <i>angulispora</i> | -                       |
| <i>F. merismoides</i>                 | -                       | <i>P. chrysogenum</i>                        | -                       |
| <i>G. cingulata</i>                   | -                       | <i>T. koningii</i>                           | -                       |
| <i>G. deliquescens</i>                | -                       |                                              |                         |

<sup>\*</sup> Capability of transformation of (–)- $\alpha$ -bisabolol (**1**): (-) no transformation; (+) lower yield of metabolites; (++) higher yield of metabolites; (+++) highest yield of metabolites.

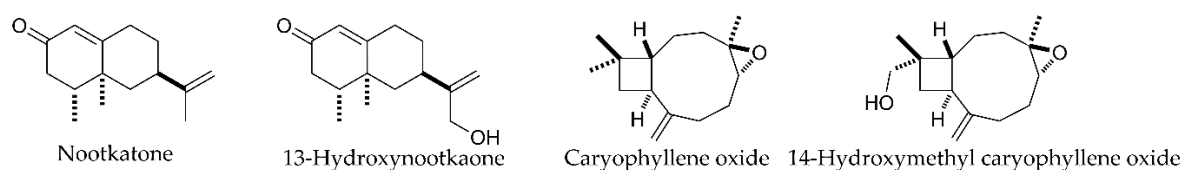

**Figure S1.** Chemical structures of nootkatone, 13-hydroxynootkatone, caryophyllene oxide and 14-hydroxymethyl caryophyllene oxide.

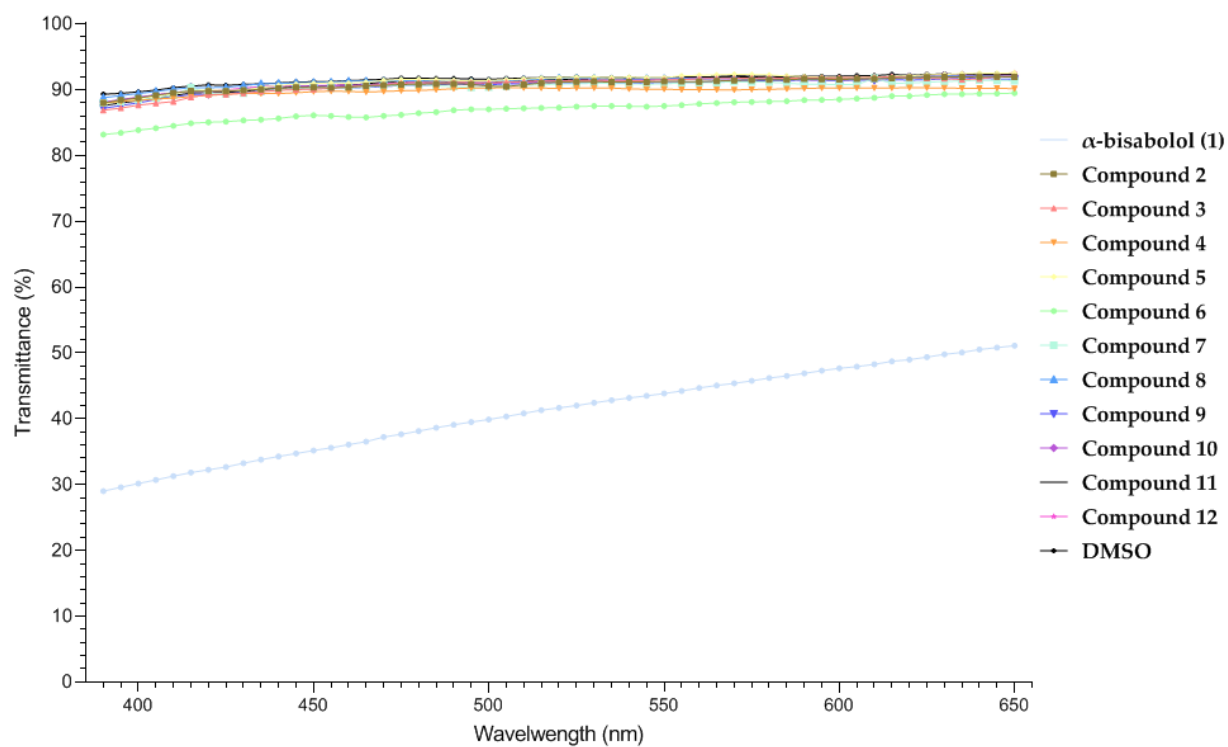

**Figure S2.** Light transmittance of the diluted solutions of (-)- $\alpha$ -bisabolol (1) and its metabolites in water.

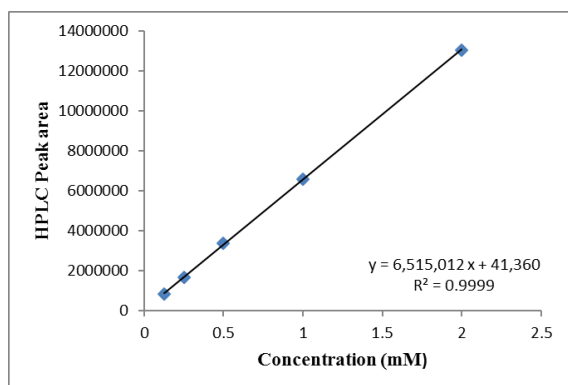

**Figure S3.** Calibration of measurement for solubility of (-)- $\alpha$ -bisabolol (1).

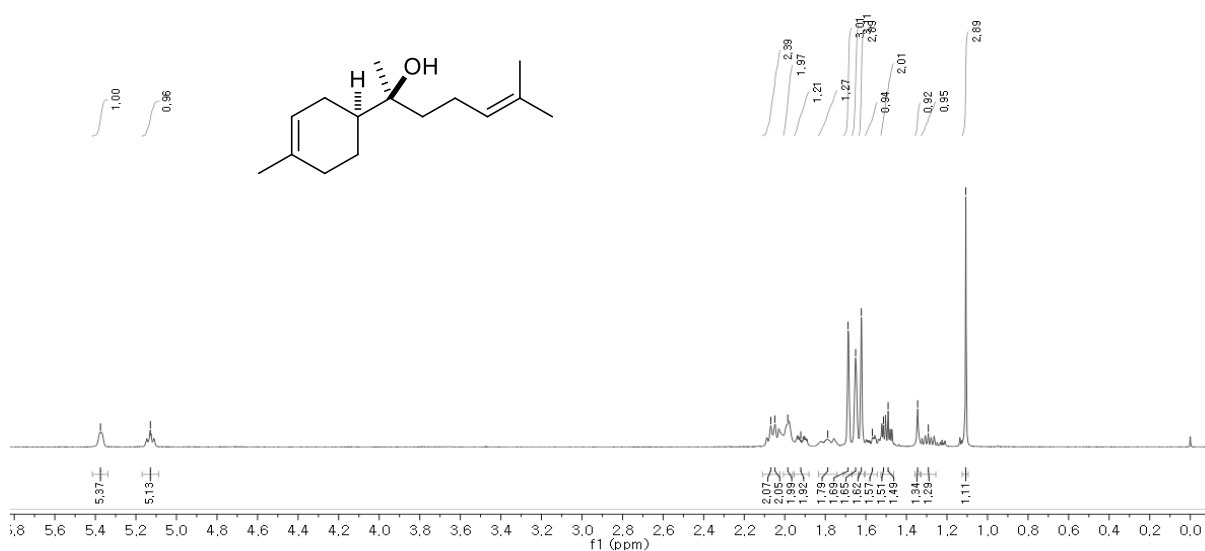

**Figure S4.**  $^1\text{H}$  NMR spectrum of compound **1** recorded at 400 MHz in  $\text{CDCl}_3$

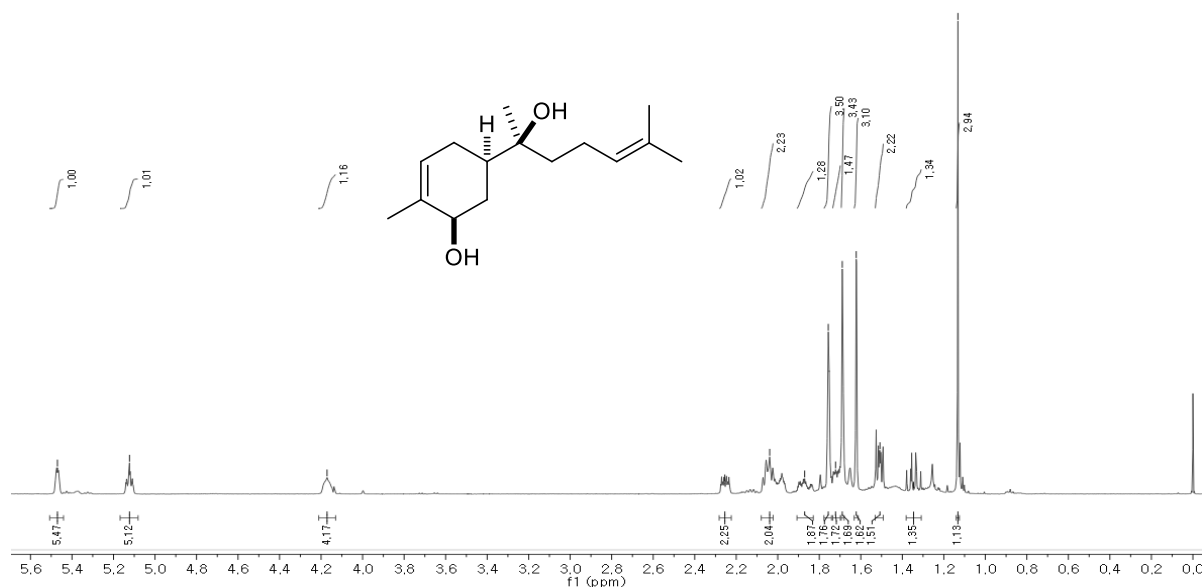

**Figure S5.**  $^1\text{H}$  NMR spectrum of compound **2** recorded at 500 MHz in  $\text{CDCl}_3$ .

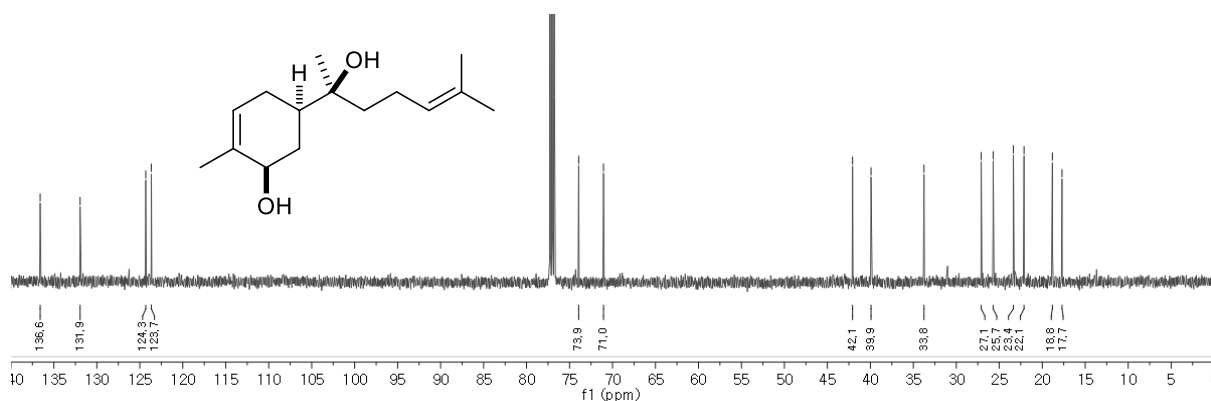

**Figure S6.**  $^{13}\text{C}$  NMR spectrum of compound **2** recorded at 125 MHz in  $\text{CDCl}_3$ .

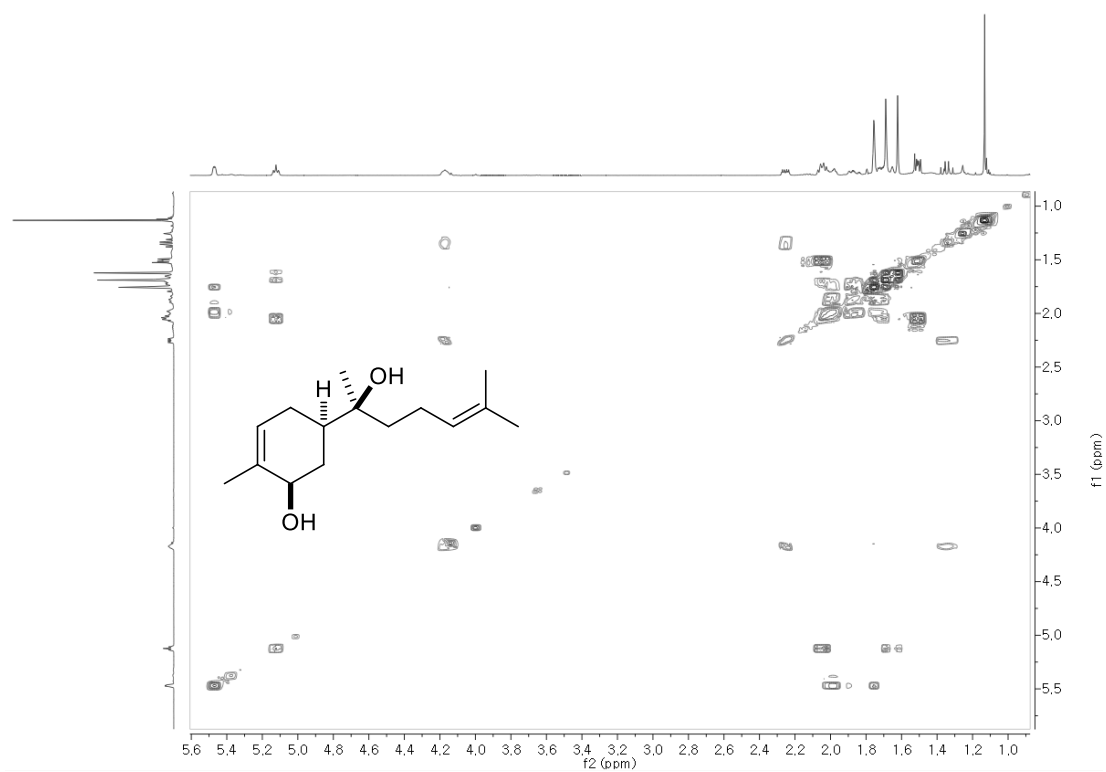

Figure S7. COSY spectrum of compound **2** recorded at 125 MHz in CDCl<sub>3</sub>.

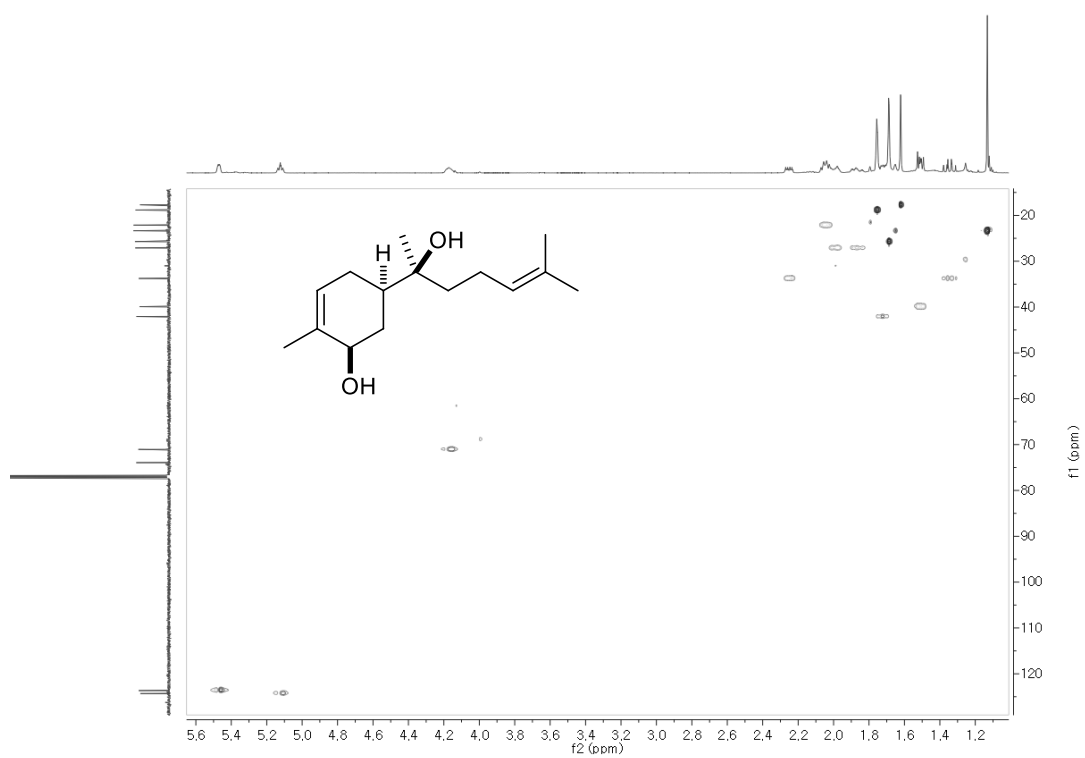

Figure S8. HSQC spectrum of compound **2** recorded at 500 MHz in CDCl<sub>3</sub>.

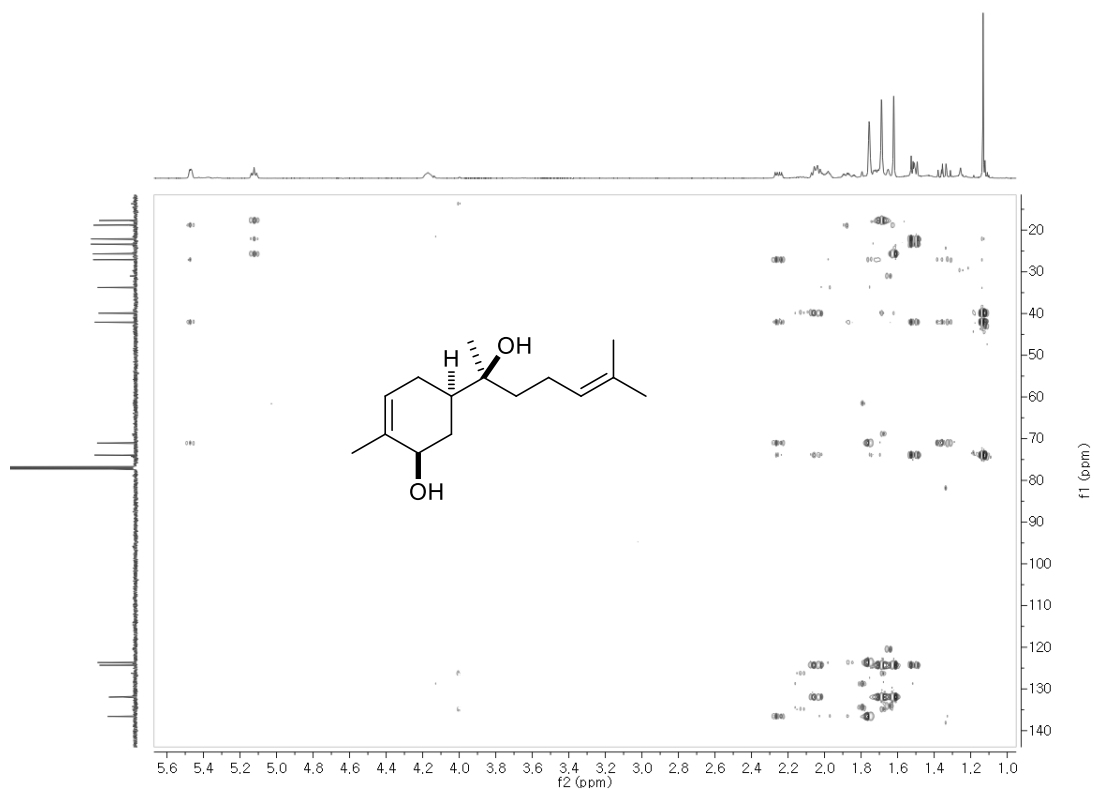

**Figure S9.** HMBC spectrum of compound **2** recorded at 500 MHz in CDCl<sub>3</sub>.

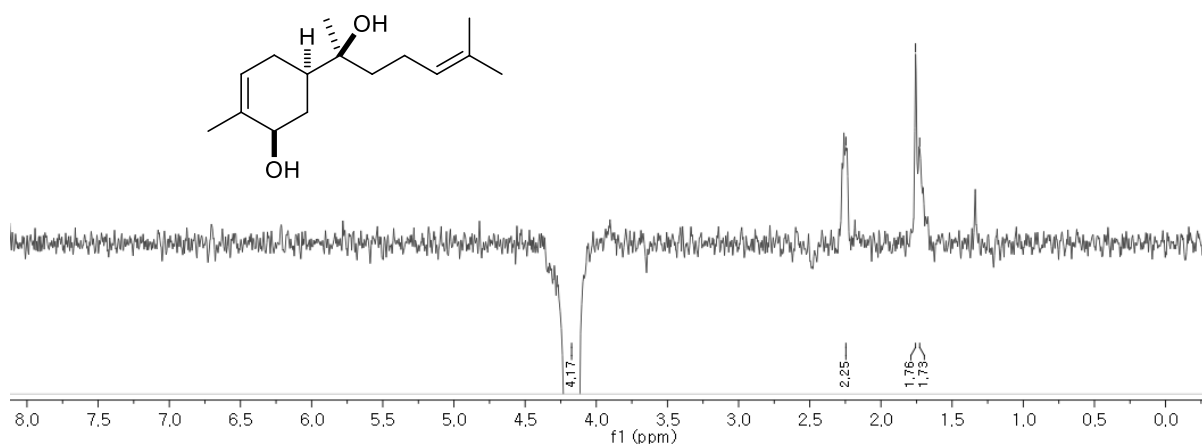

**Figure S10.** NOE spectrum of compound **2** recorded at 500 MHz in CDCl<sub>3</sub>.

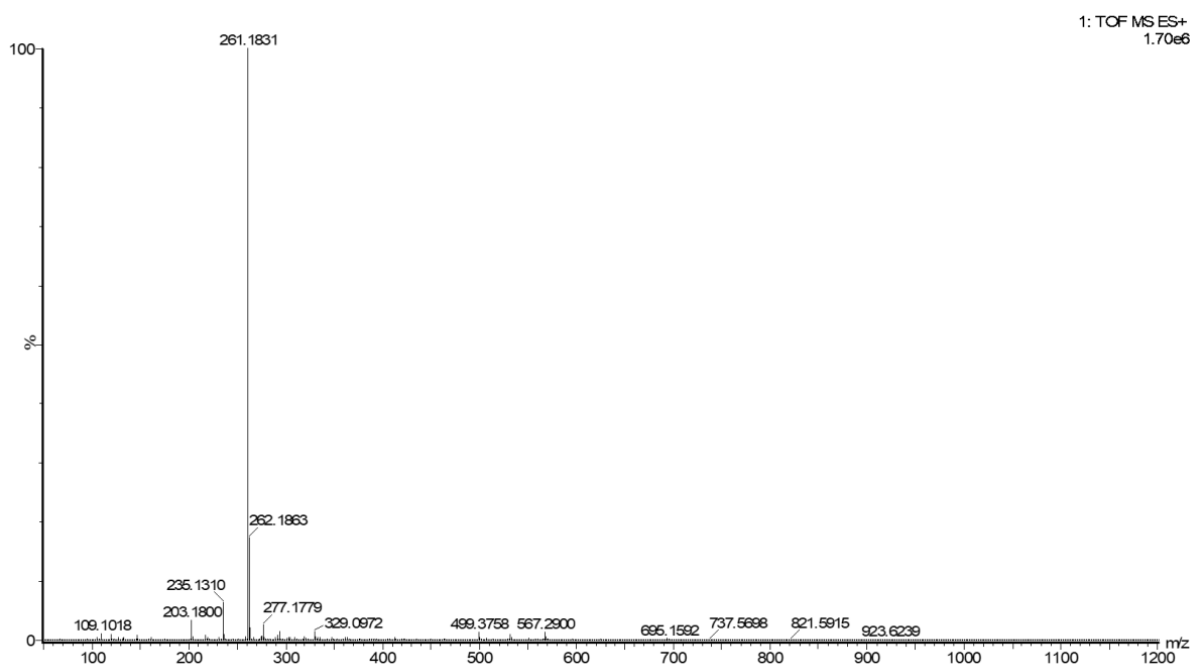

Figure S11. The HRESIMS spectroscopic data of compound 2.

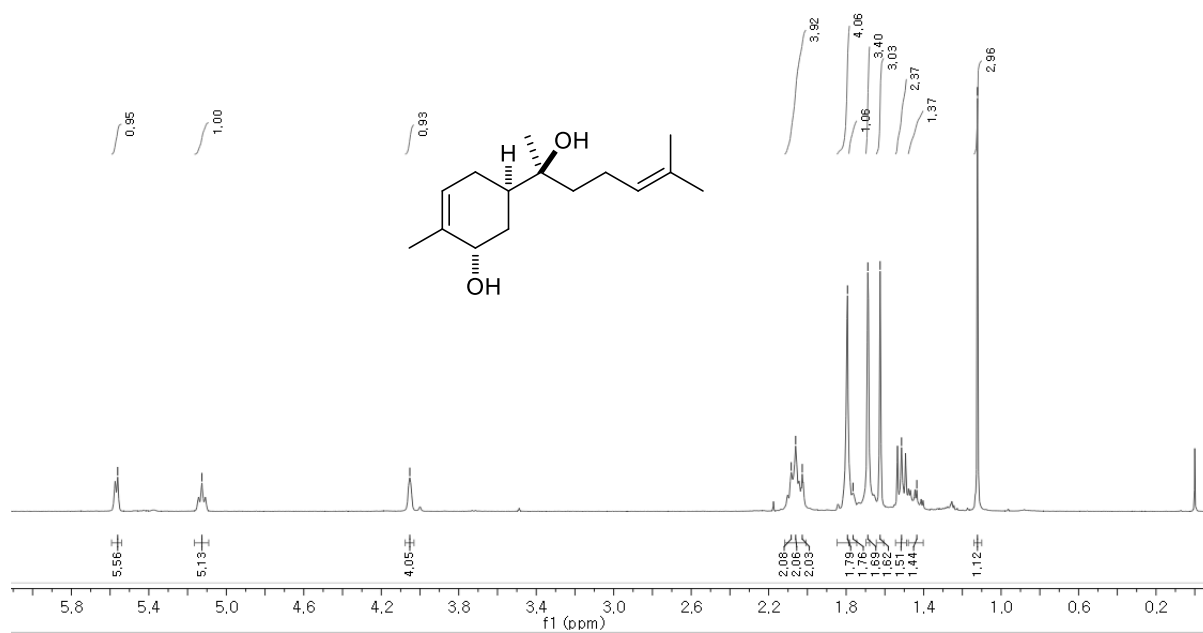

Figure S12.  $^1\text{H}$  NMR spectrum of compound 3 recorded at 500 MHz in  $\text{CDCl}_3$ .

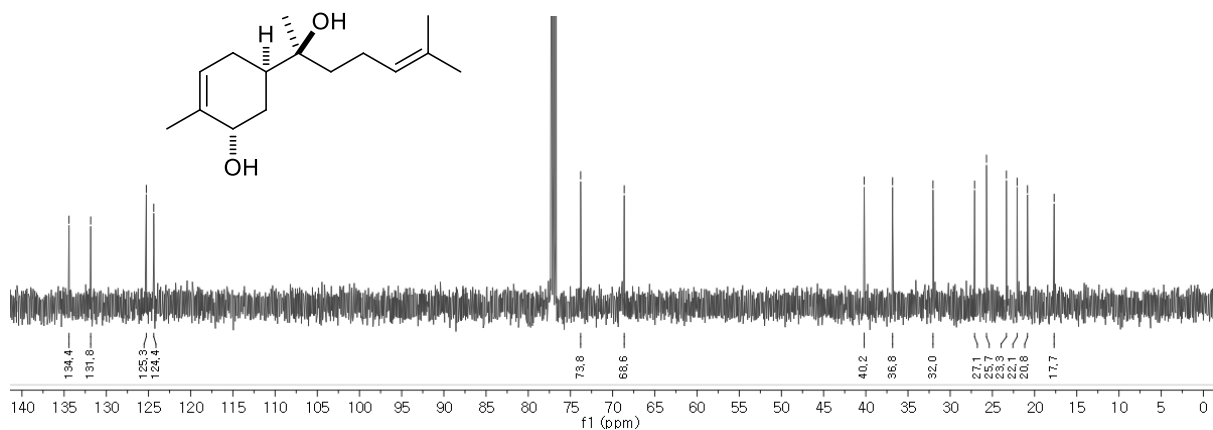

**Figure S13.**  $^{13}\text{C}$  NMR spectrum of compound **3** recorded at 125 MHz in  $\text{CDCl}_3$ .

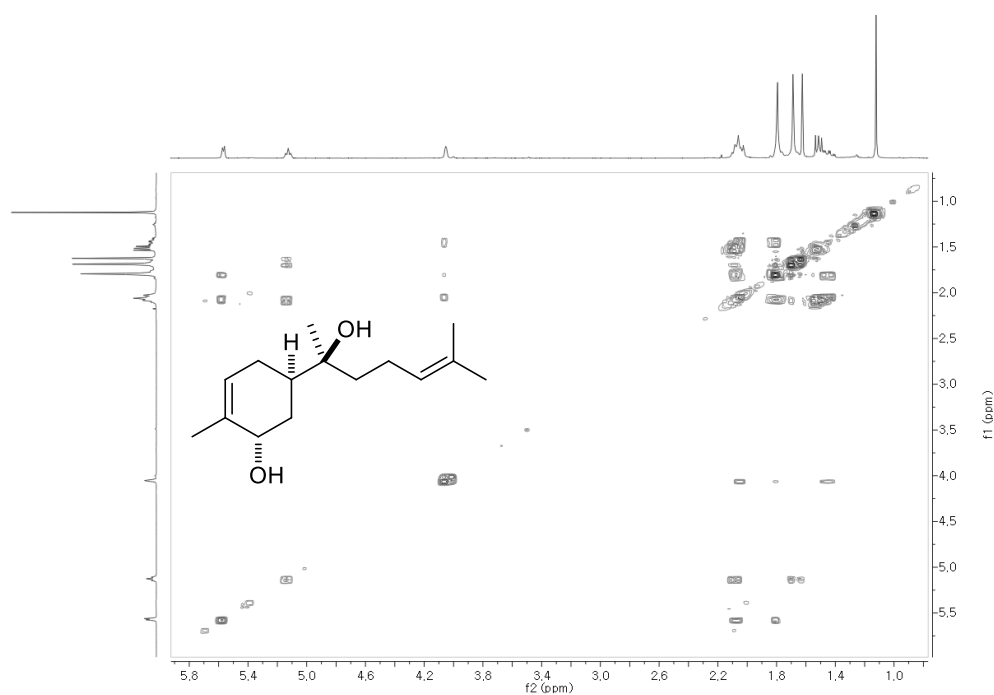

**Figure S14.** COSY spectrum of compound **3** recorded at 500 MHz in  $\text{CDCl}_3$ .

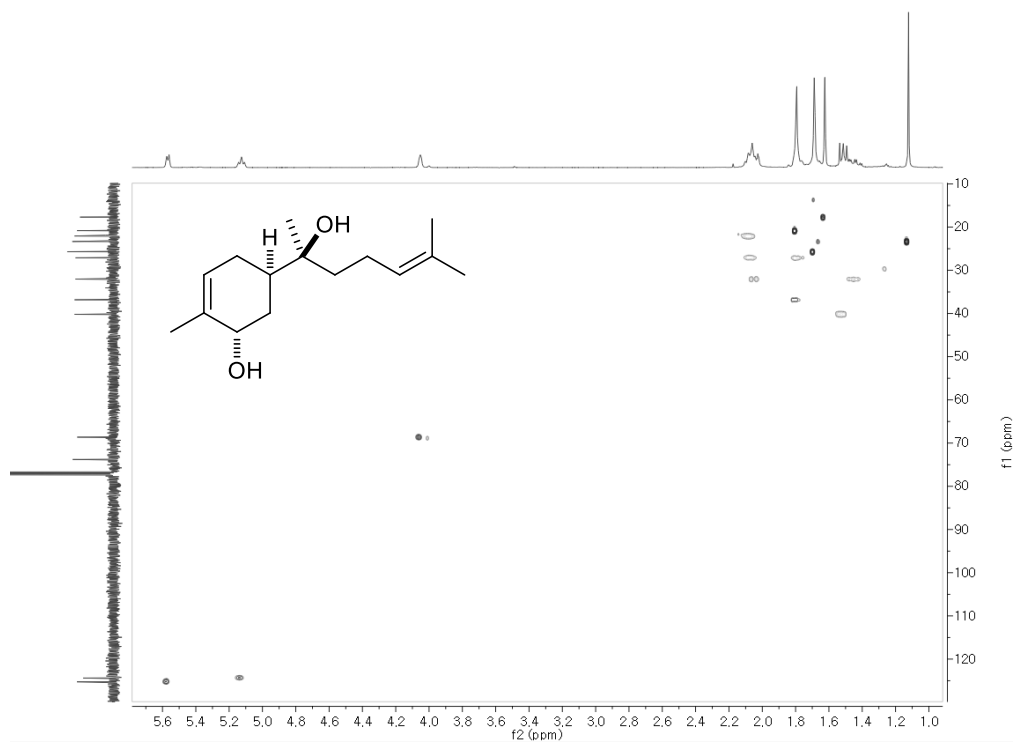

**Figure S15.** HSQC spectrum of compound **3** recorded at 500 MHz in CDCl<sub>3</sub>.

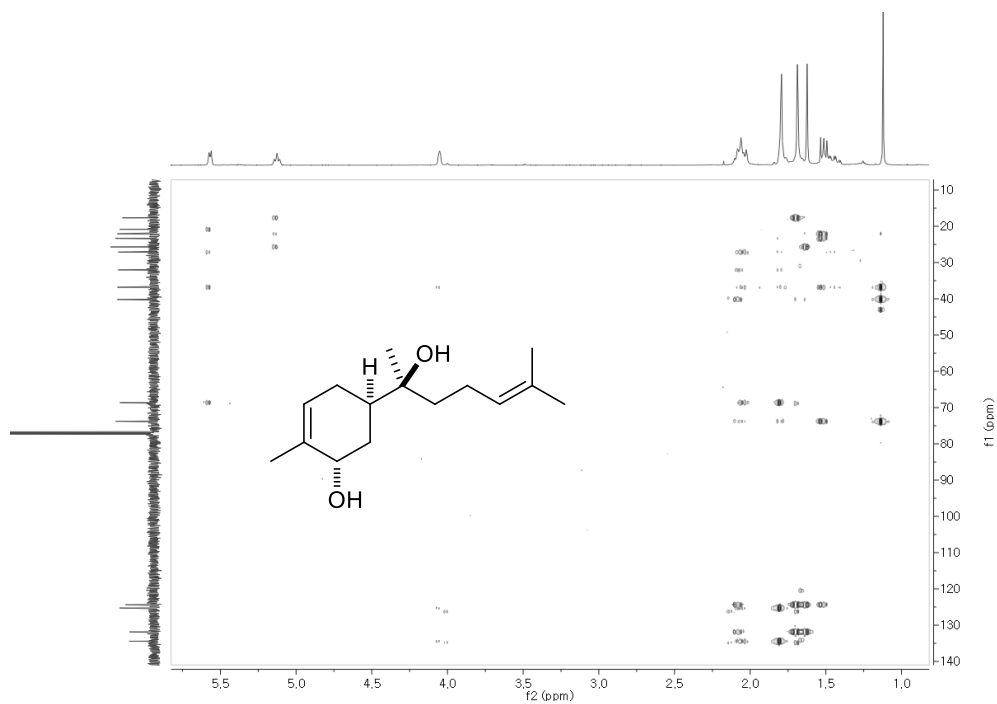

**Figure S16.** HMBC spectrum of compound **3** recorded at 500 MHz in CDCl<sub>3</sub>.

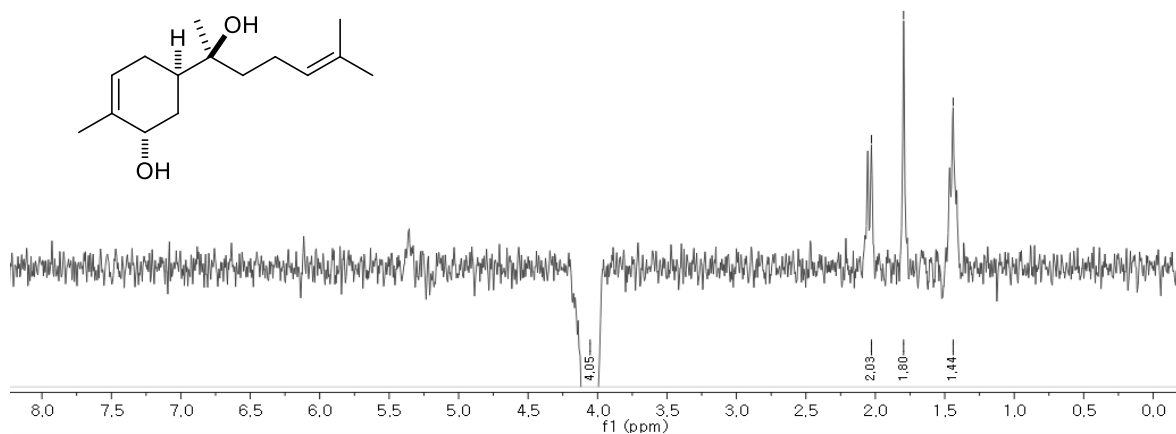

**Figure S17.** NOE spectrum of compound **3** recorded at 500 MHz in CDCl<sub>3</sub>.

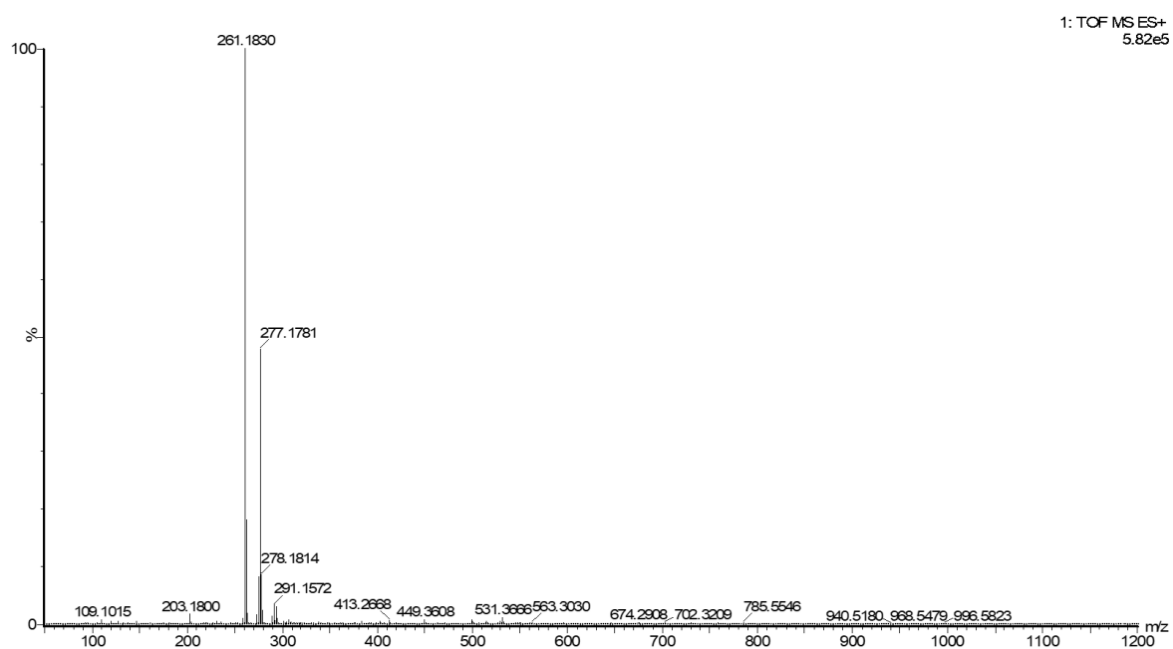

**Figure S18.** The HRESIMS spectroscopic data of compound **3**.

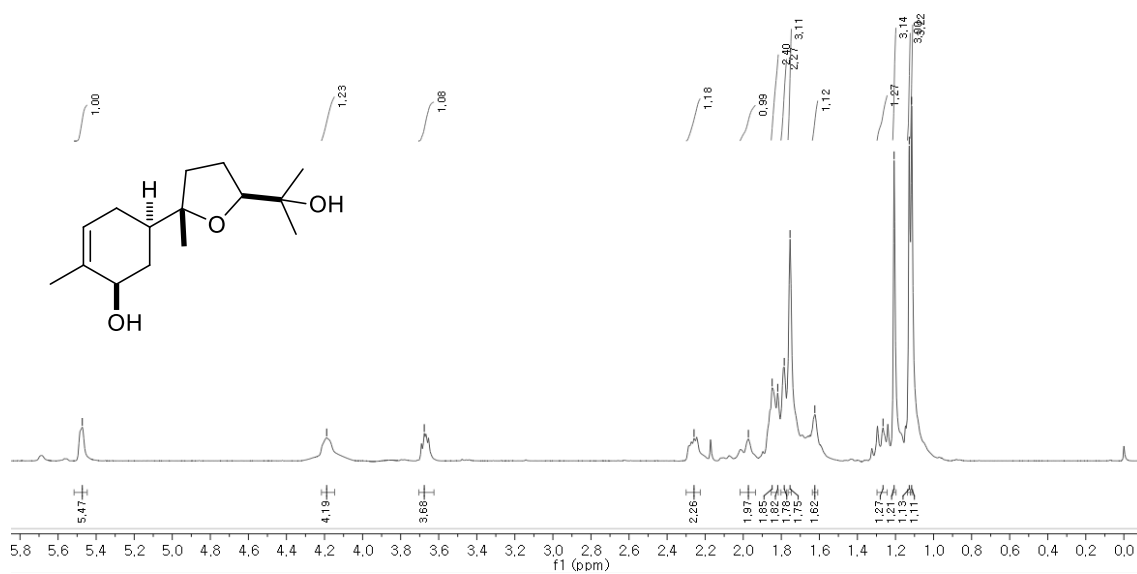

**Figure S19.**  $^1\text{H}$  NMR spectrum of compound **4** recorded at 400 MHz in  $\text{CDCl}_3$ .

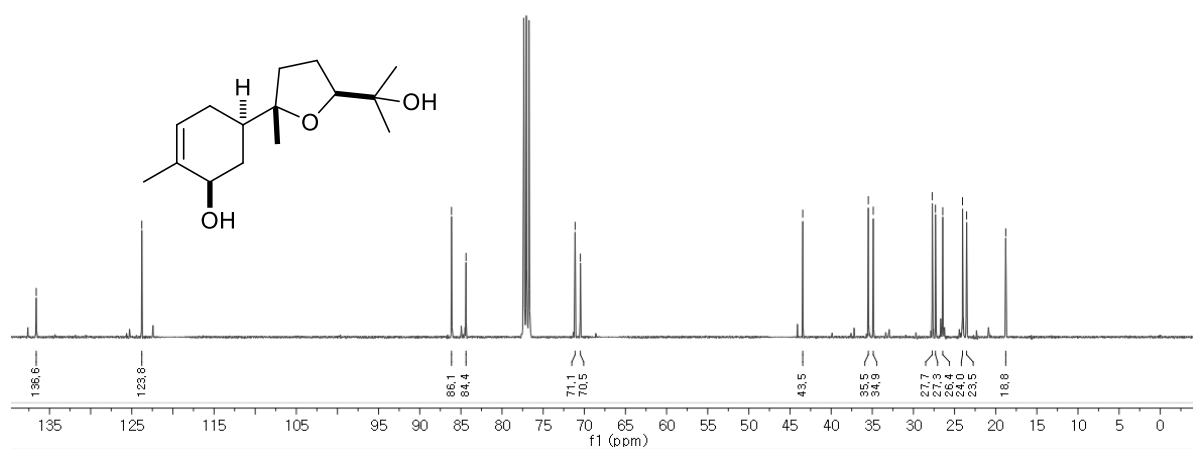

**Figure S20.**  $^{13}\text{C}$  NMR spectrum of compound **4** recorded at 100 MHz in  $\text{CDCl}_3$ .

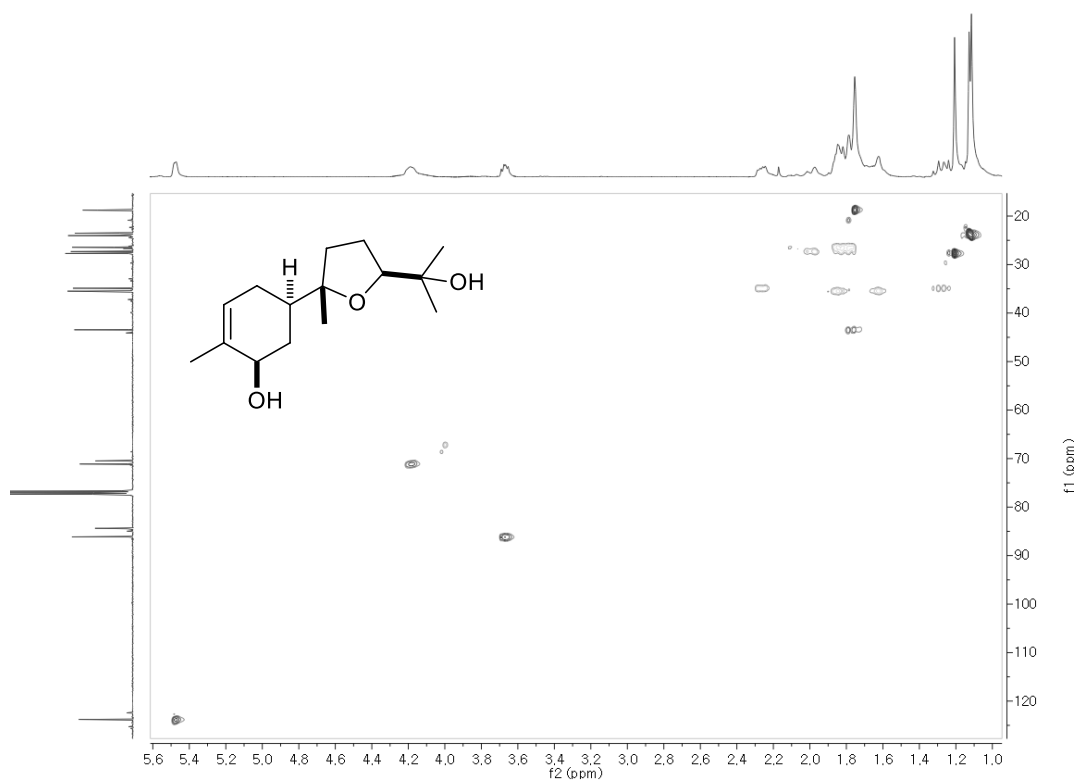

Figure S21. HSQC spectrum of compound **4** recorded at 400 MHz in CDCl<sub>3</sub>.

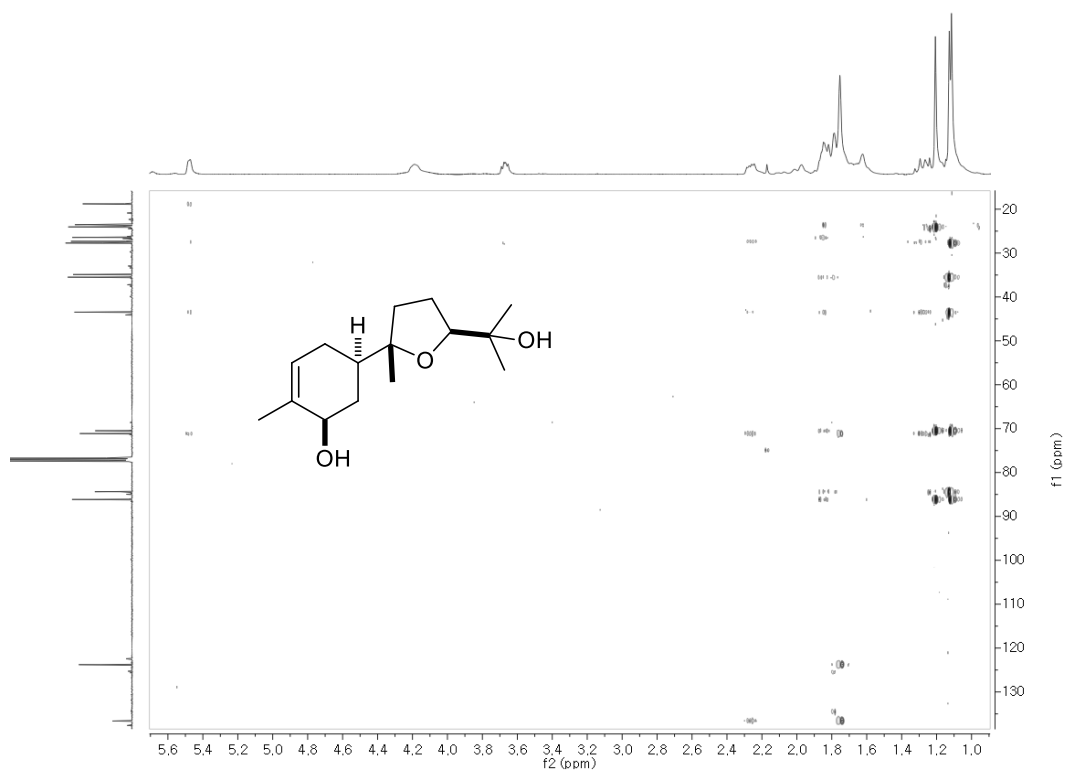

Figure S22. HMBC spectrum of compound **4** recorded at 400 MHz in CDCl<sub>3</sub>.

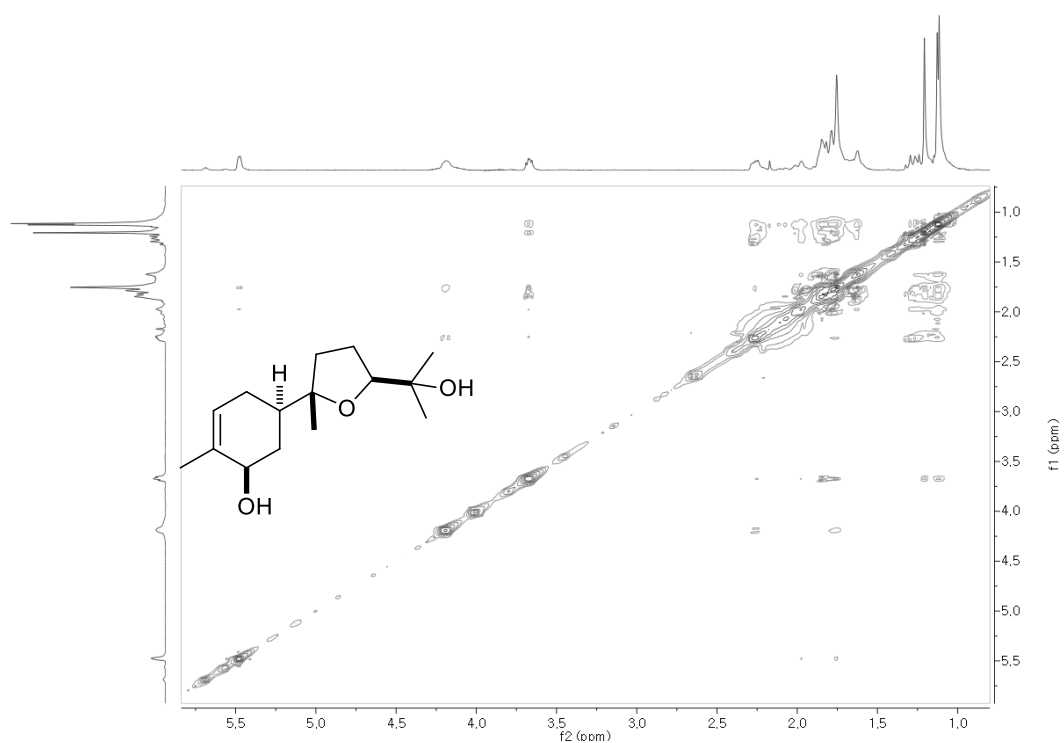

Figure S23. NOESY spectrum of compound **4** recorded at 400 MHz in CDCl<sub>3</sub>.

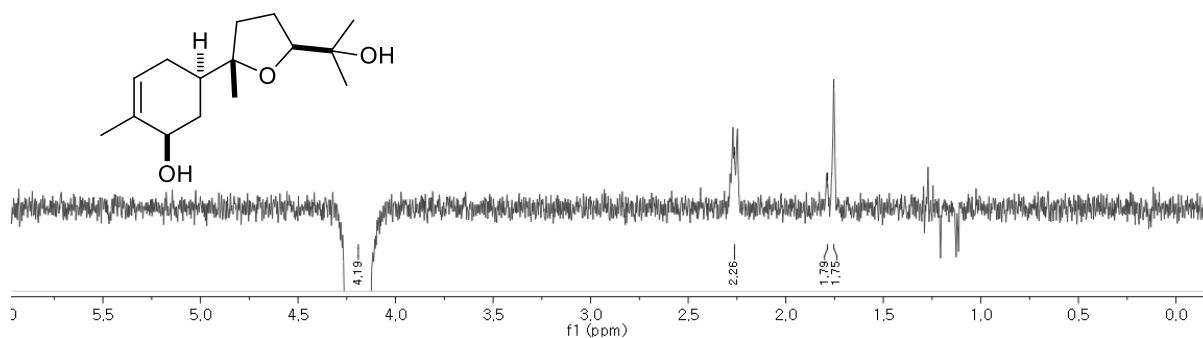

Figure S24. 1D ROESY spectrum of compound **4** recorded at 500 MHz in CDCl<sub>3</sub>.

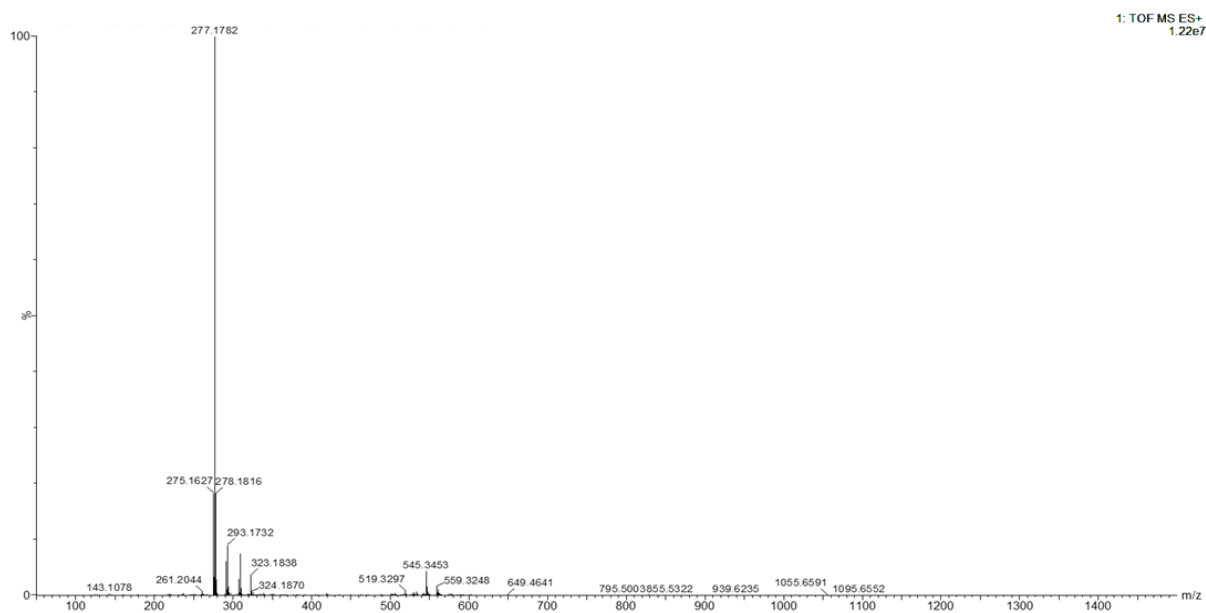

**Figure S25.** The HRESIMS spectroscopic data of compound **4**.

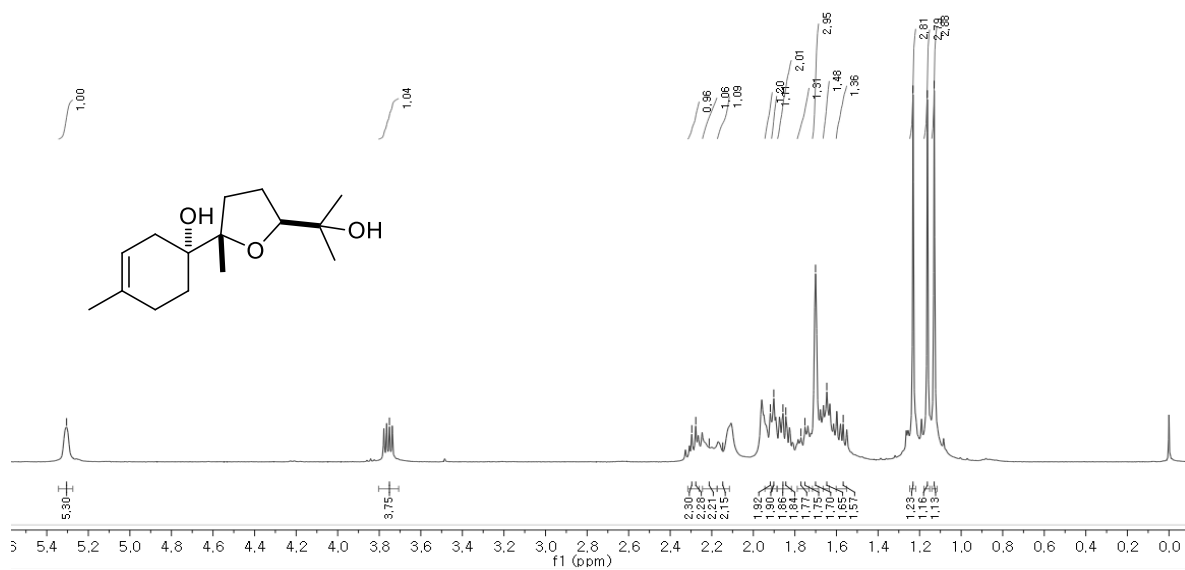

**Figure S26.** <sup>1</sup>H NMR spectrum of compound **5** recorded at 400 MHz in CDCl<sub>3</sub>.

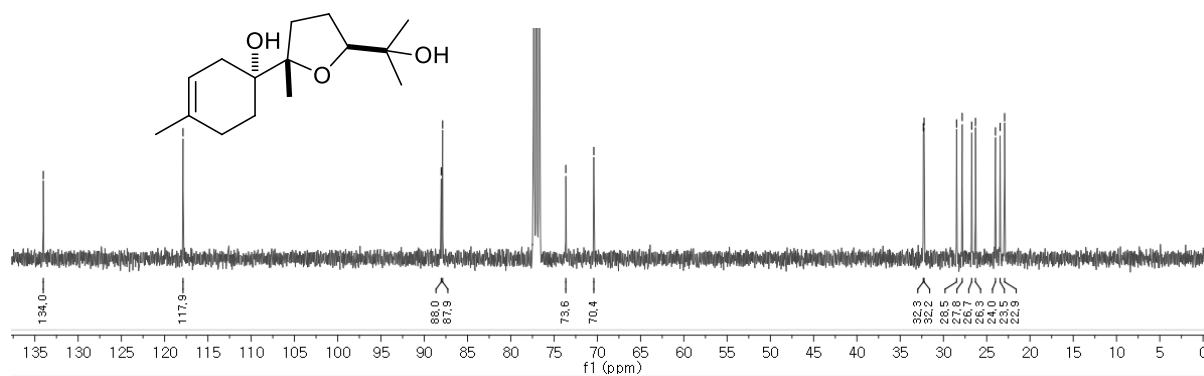

**Figure S27.** <sup>13</sup>C NMR spectrum of compound **5** recorded at 100 MHz in CDCl<sub>3</sub>.

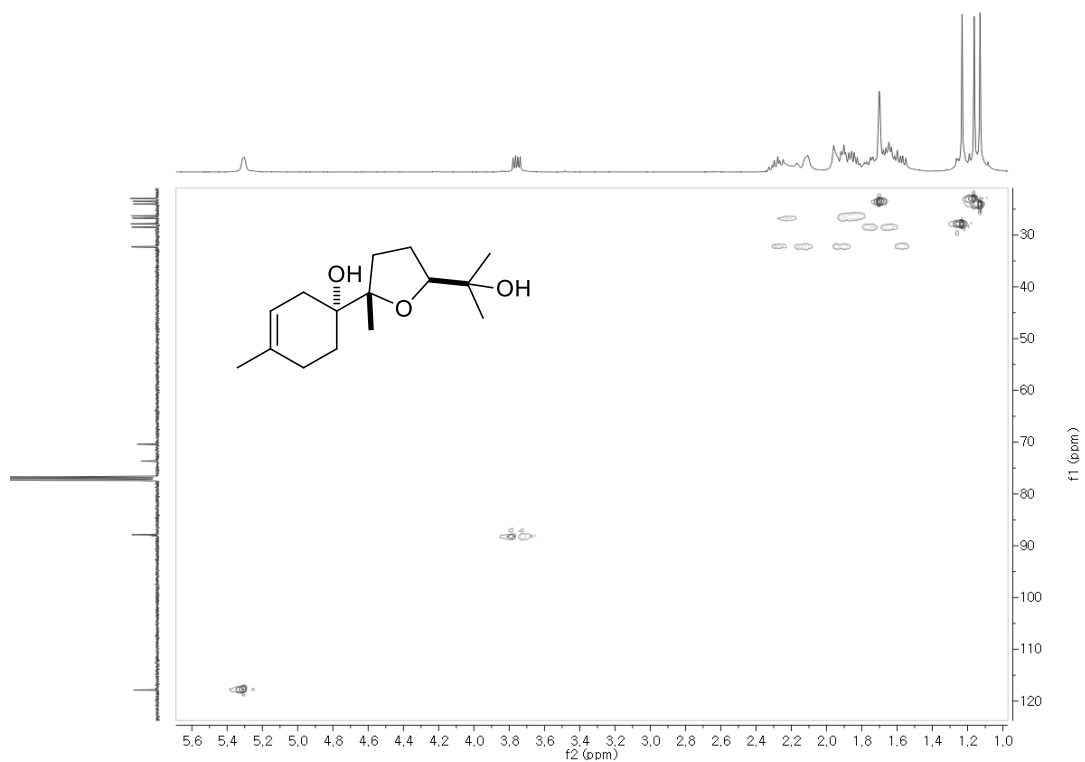

Figure S28. HSQC spectrum of compound **5** recorded at 400 MHz in CDCl<sub>3</sub>.

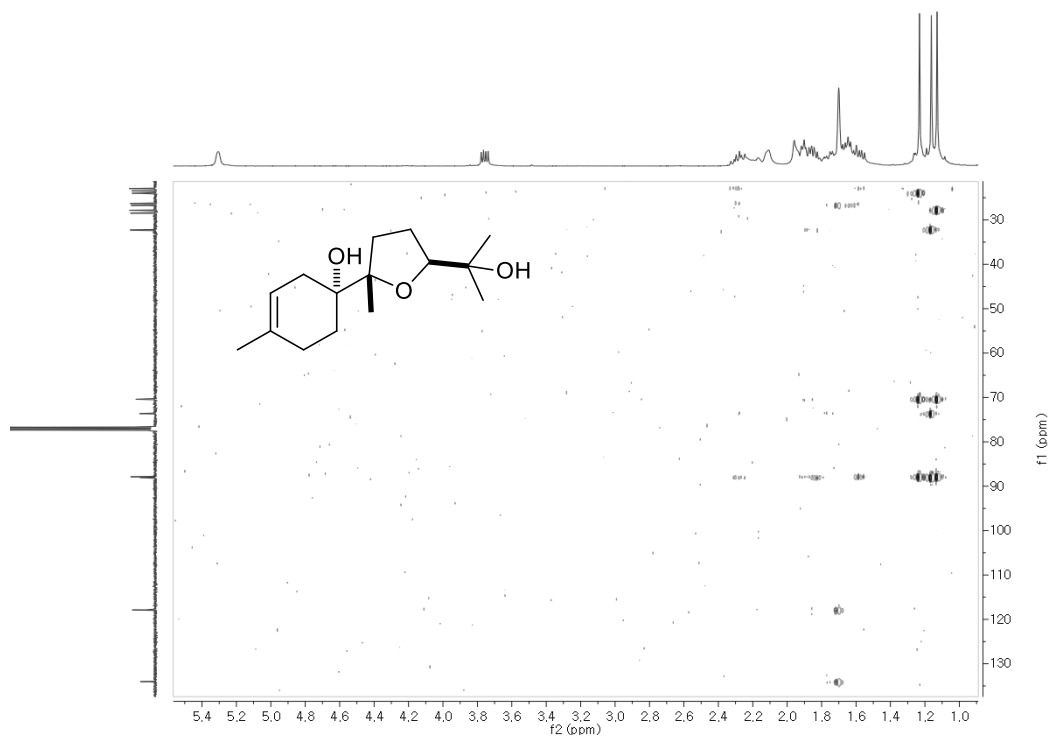

Figure S29. HMBC spectrum of compound **5** recorded at 400 MHz in CDCl<sub>3</sub>.

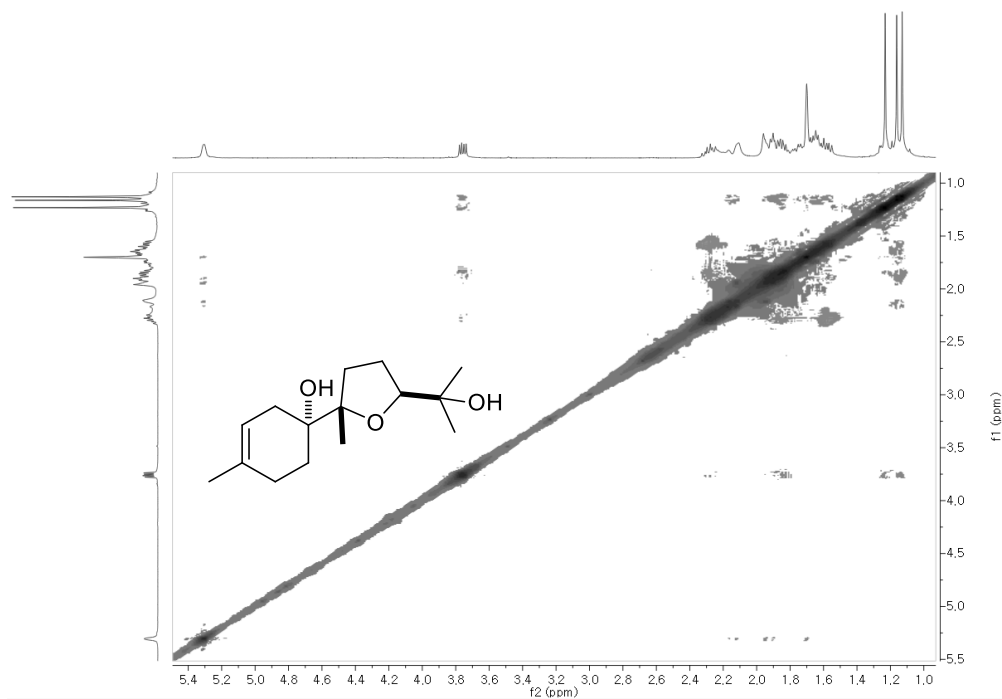

**Figure S30.** NOESY spectrum of compound **5** recorded at 400 MHz in CDCl<sub>3</sub>.

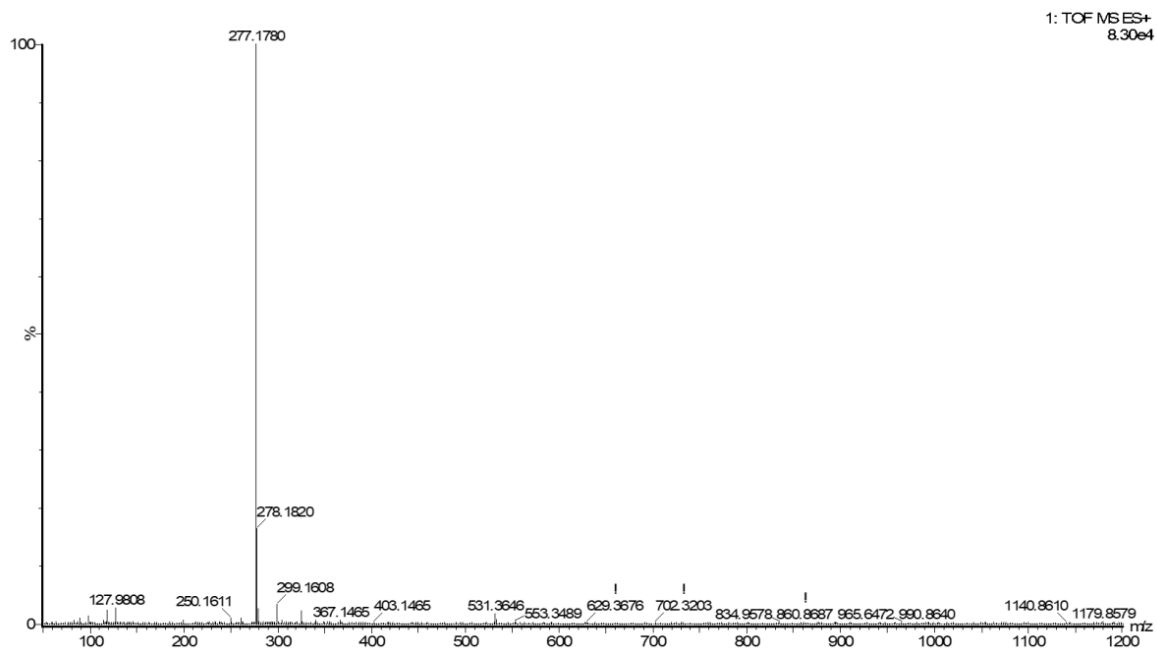

**Figure S31.** The HRESIMS spectrum of compound **5**.

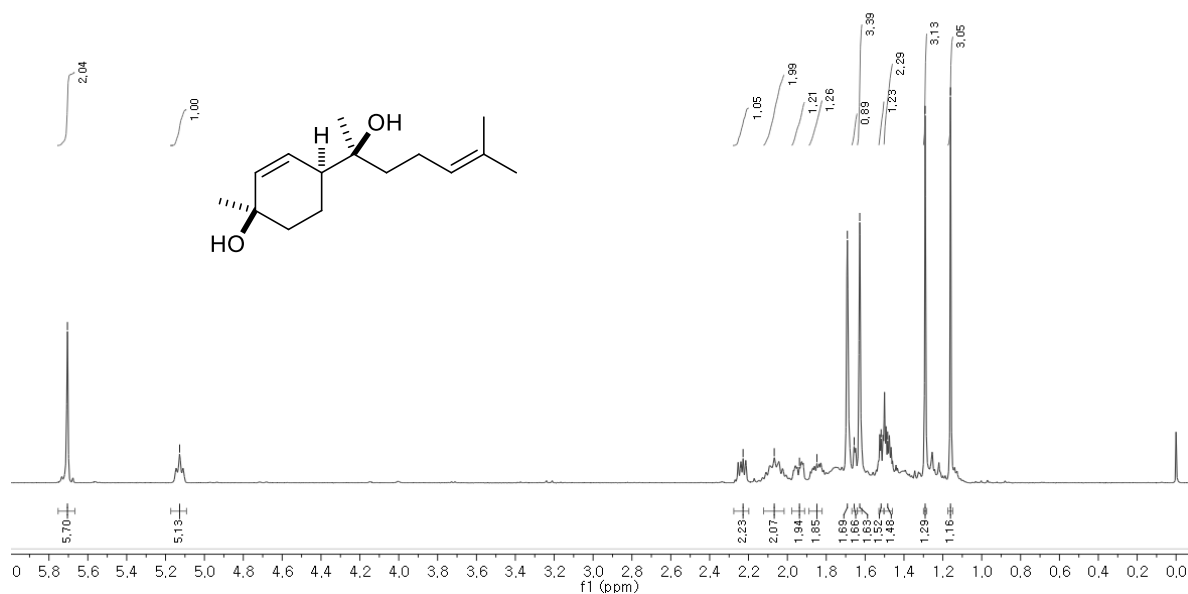

**Figure S32.**  $^1\text{H}$  NMR spectrum of compound **6** recorded at 400 MHz in  $\text{CDCl}_3$ .

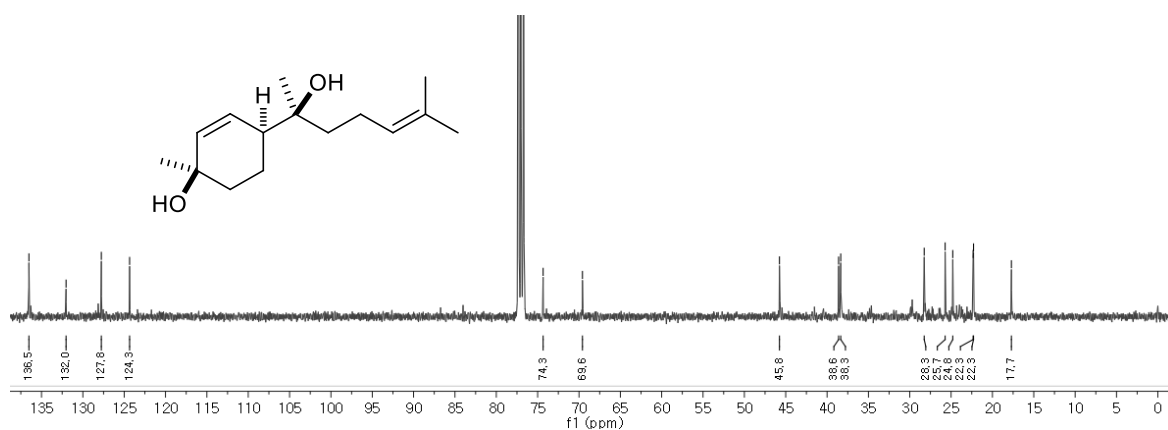

Figure S33.  $^{13}\text{C}$  NMR spectrum of compound **6** recorded at 100 MHz in  $\text{CDCl}_3$ .

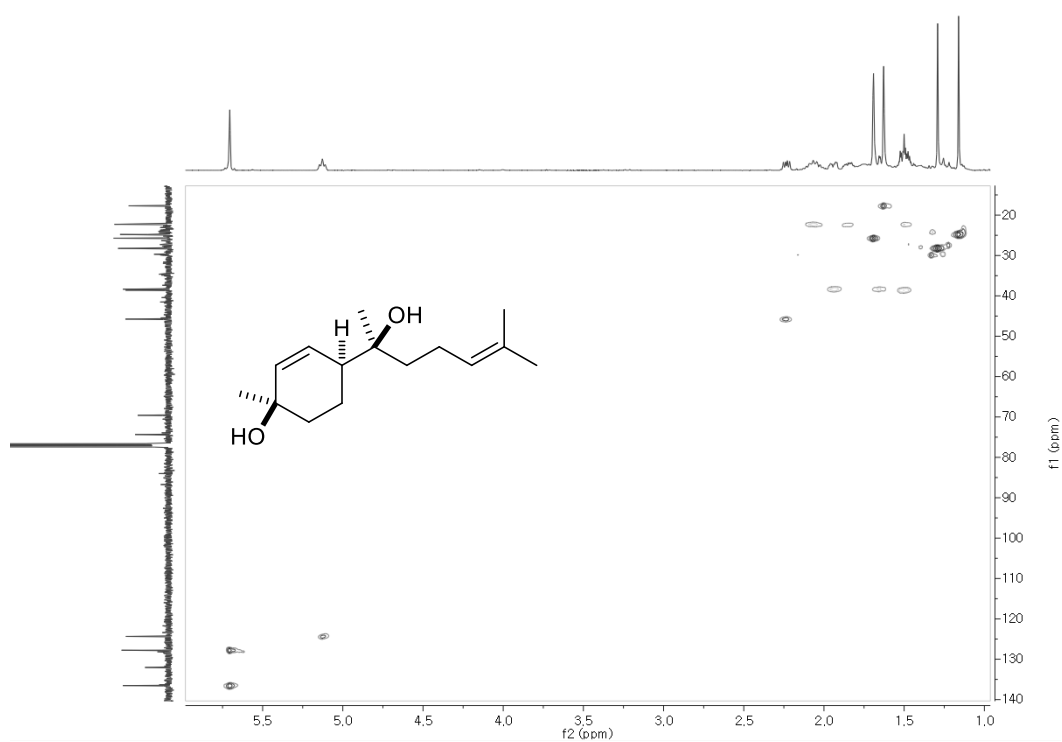

Figure S34. HSQC spectrum of compound **6** recorded at 400 MHz in  $\text{CDCl}_3$ .

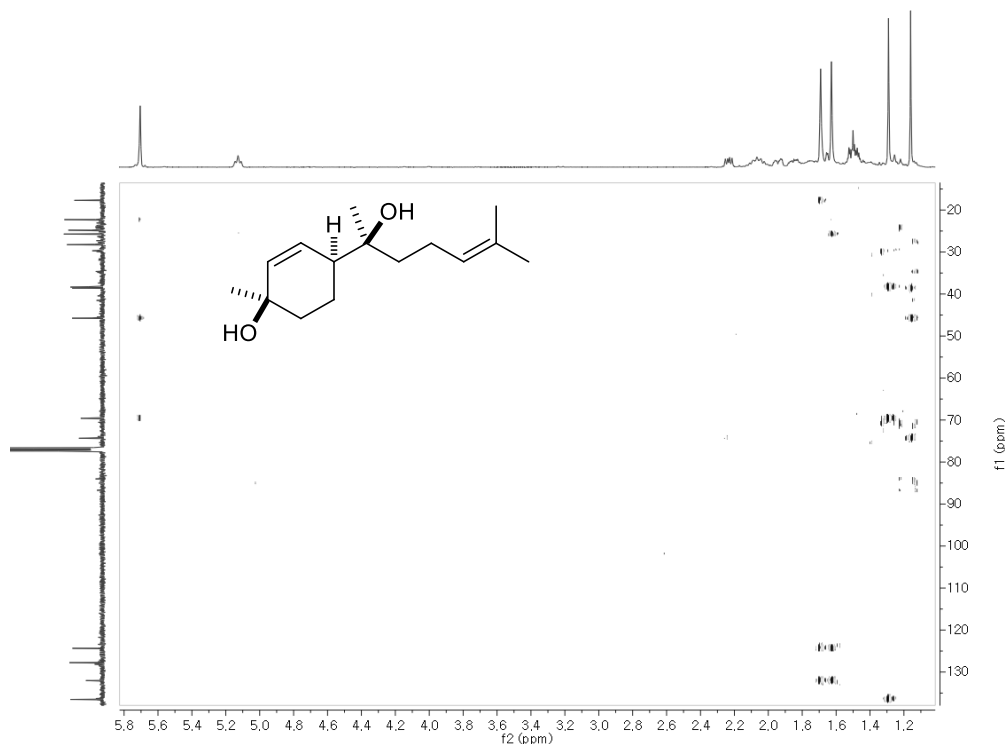

Figure S35. HMBC spectrum of compound **6** recorded at 400 MHz in CDCl<sub>3</sub>.

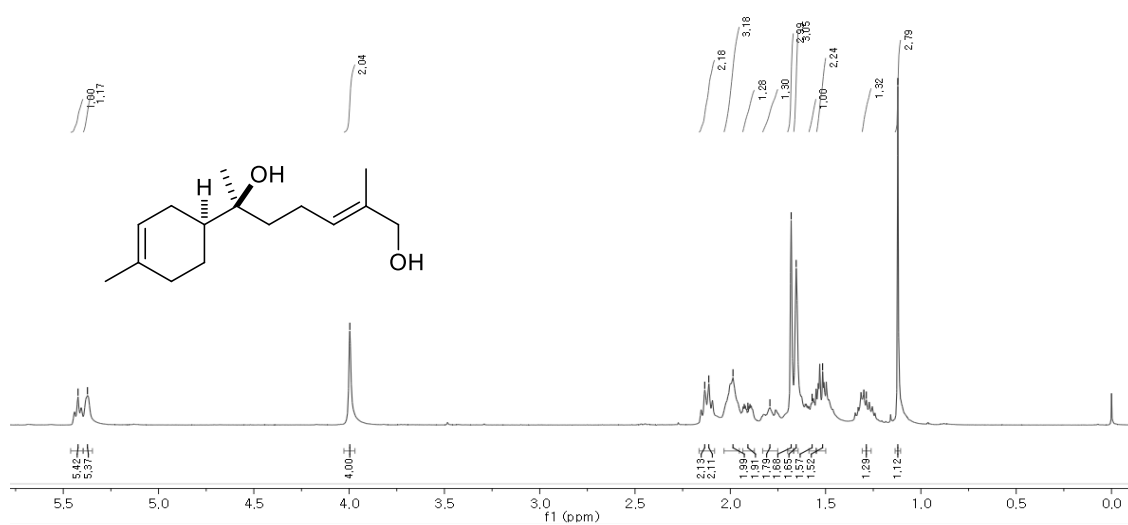

Figure S36. <sup>1</sup>H NMR spectrum of compound **7** recorded at 400 MHz in CDCl<sub>3</sub>.

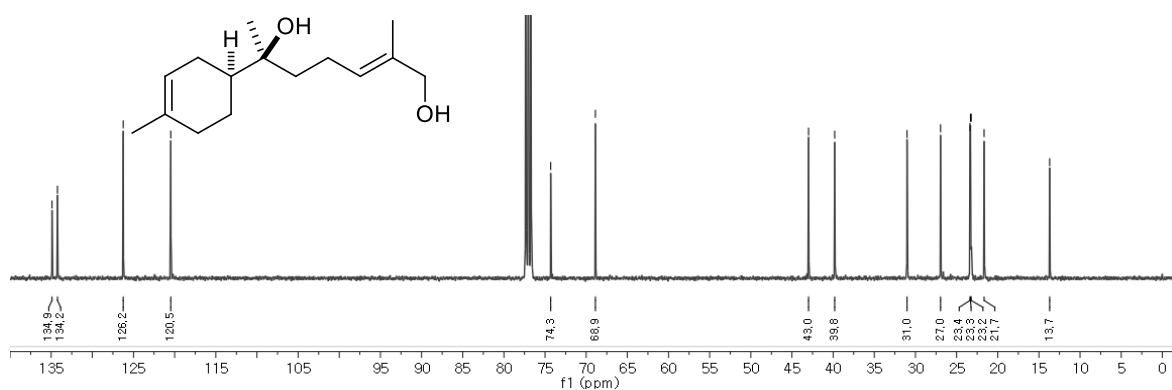

Figure S37. <sup>13</sup>C NMR spectrum of compound **7** recorded at 100 MHz in CDCl<sub>3</sub>.

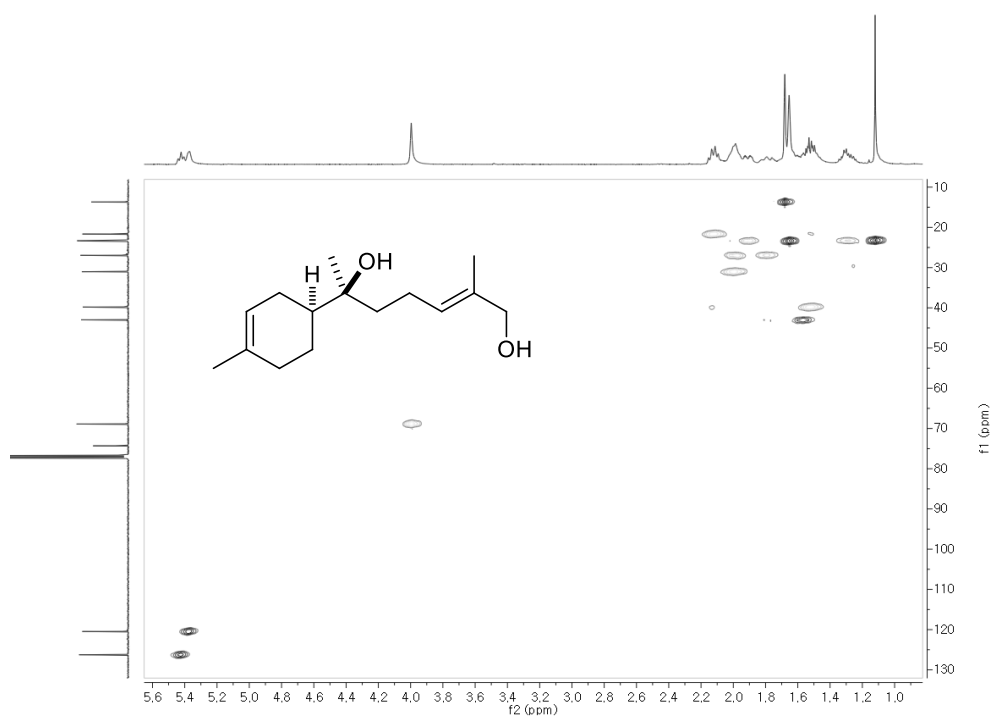

**Figure S38.** HSQC spectrum of compound **7** recorded at 400 MHz in CDCl<sub>3</sub>.

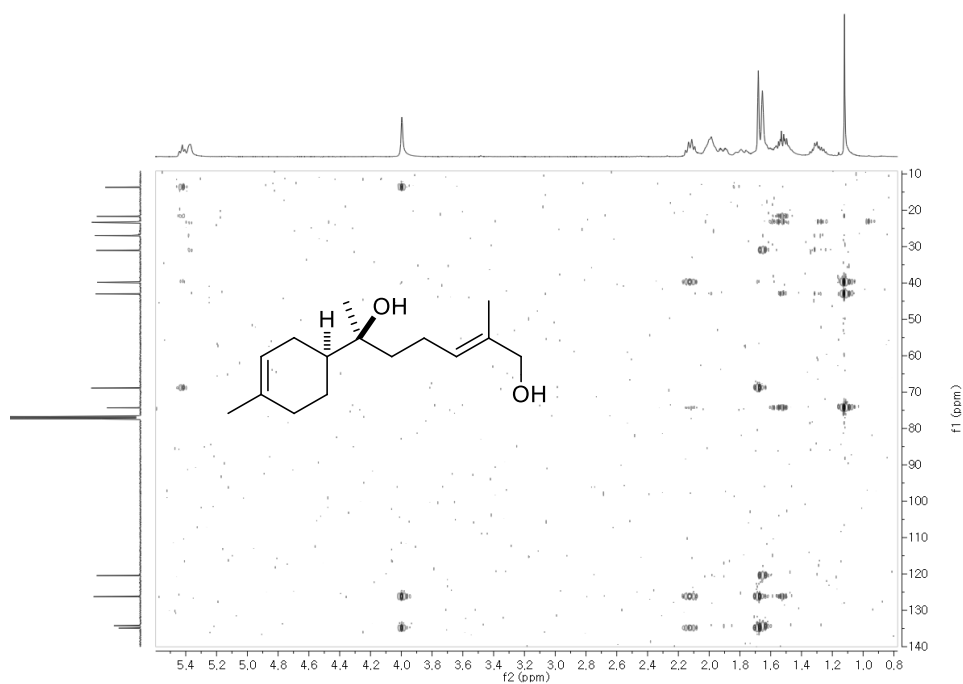

**Figure S39.** HMBC spectrum of compound **7** recorded at 400 MHz in CDCl<sub>3</sub>.

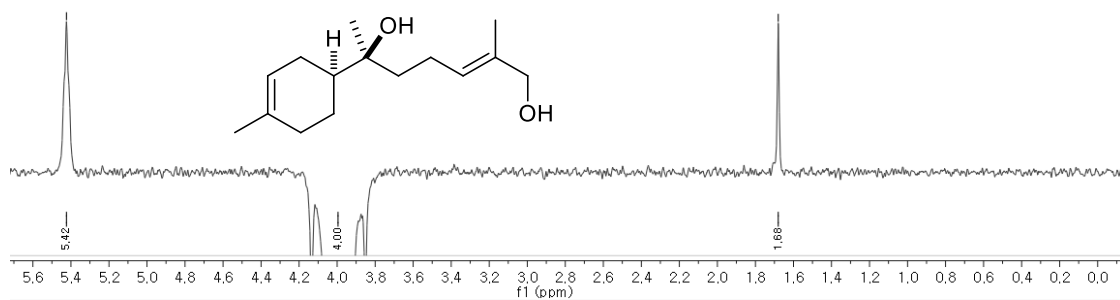

**Figure S40.** NOE spectrum of compound **7** recorded at 500 MHz in CDCl<sub>3</sub>.

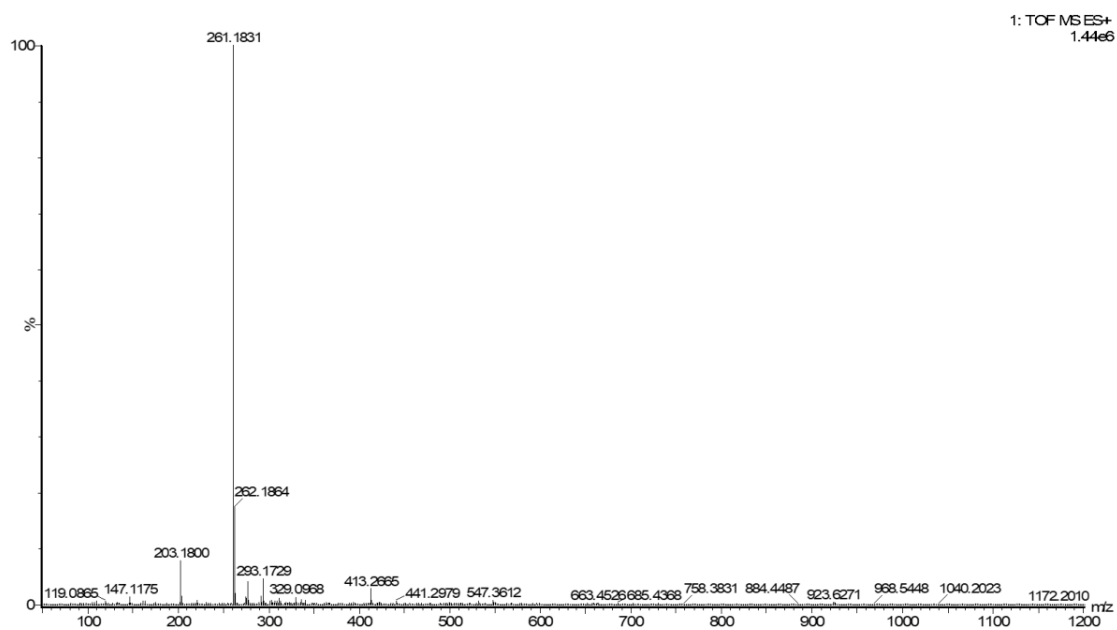

**Figure S41.** The HRESIMS spectroscopic data of compound **7**.

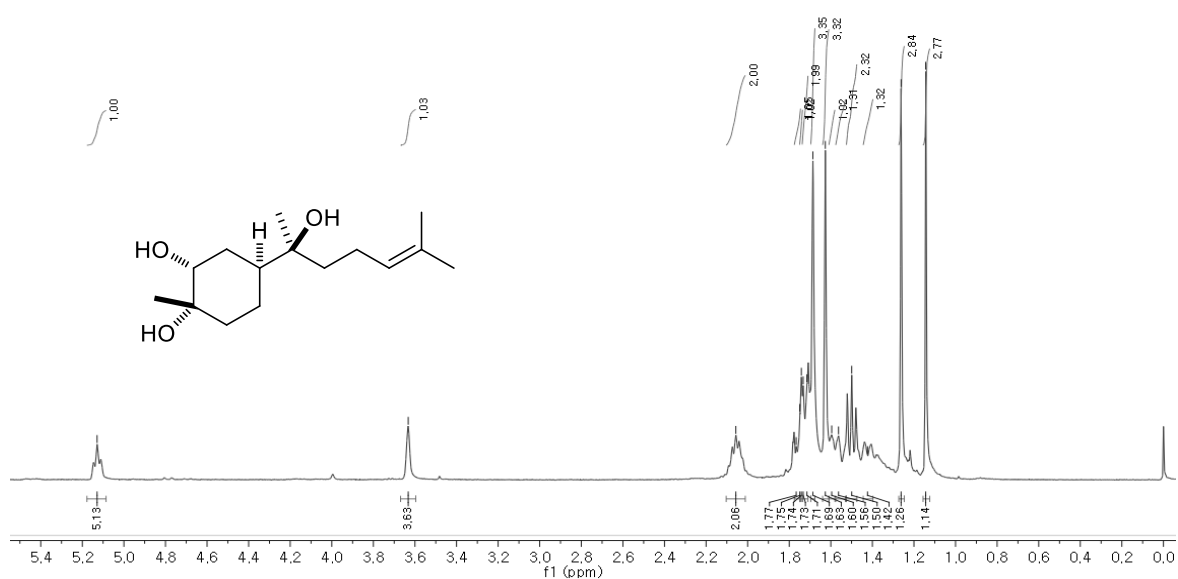

**Figure S42.** <sup>1</sup>H NMR spectrum of compound **8** recorded at 400 MHz in CDCl<sub>3</sub>.

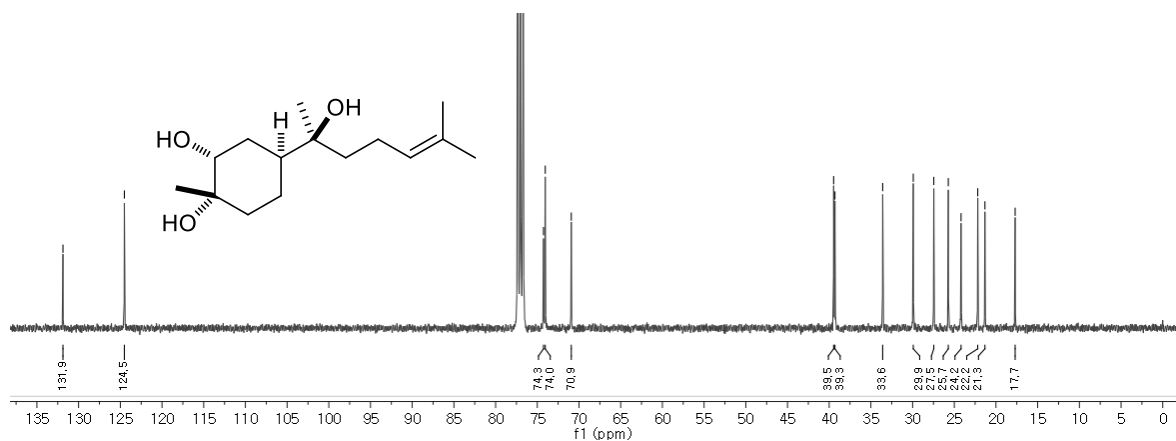

**Figure S43.** <sup>13</sup>C NMR spectrum of compound **8** recorded at 100 MHz in CDCl<sub>3</sub>.

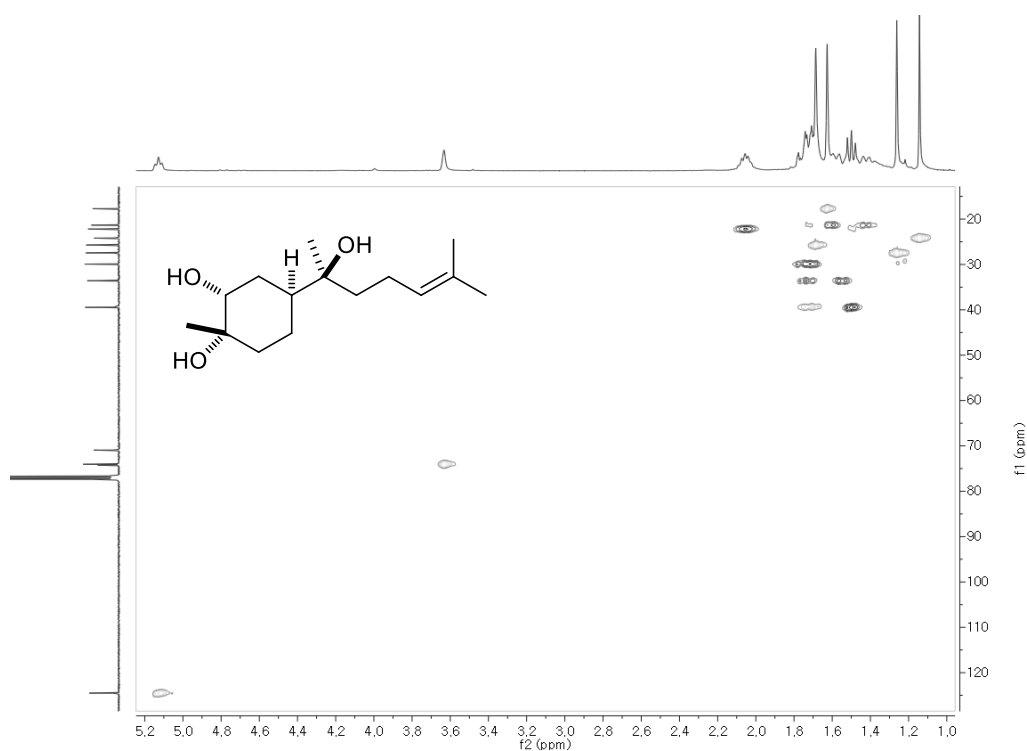

**Figure S44.** HSQC spectrum of compound **8** recorded at 400 MHz in CDCl<sub>3</sub>.

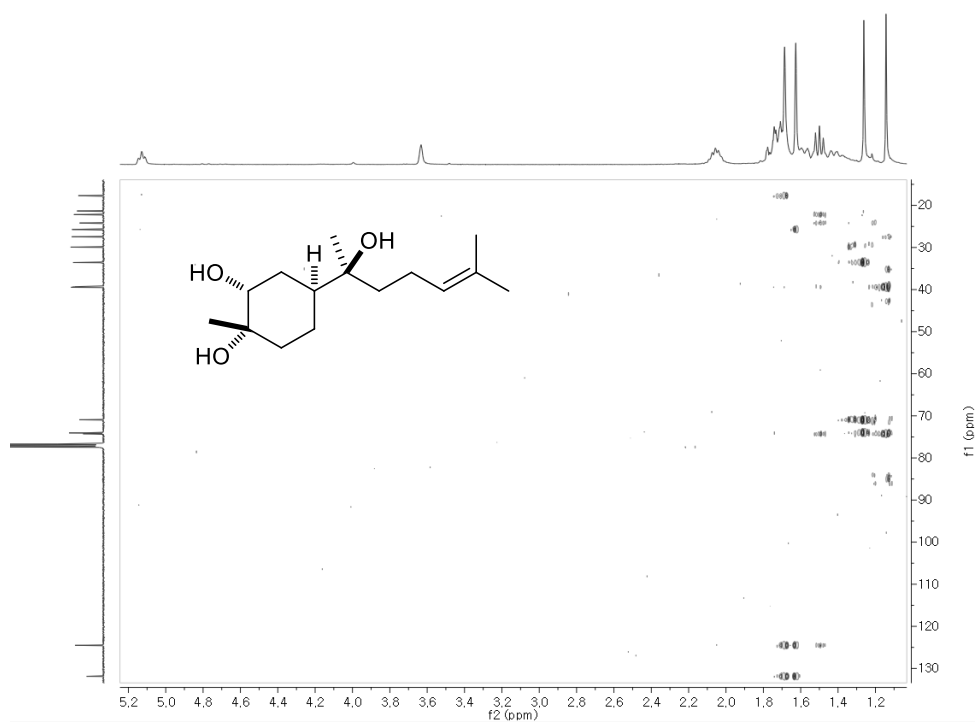

**Figure S45.** HMBC spectrum of compound **8** recorded at 400 MHz in CDCl<sub>3</sub>.

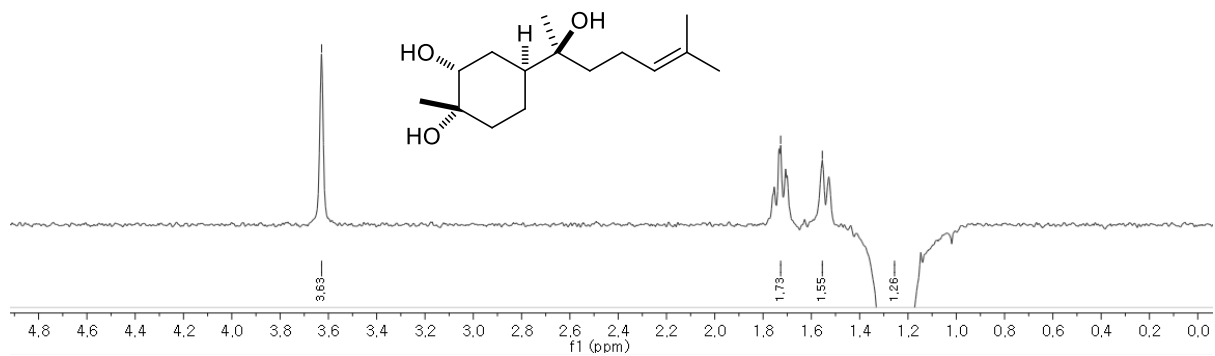

**Figure S46.** NOE spectrum of compound **8** recorded at 500 MHz in CDCl<sub>3</sub>.

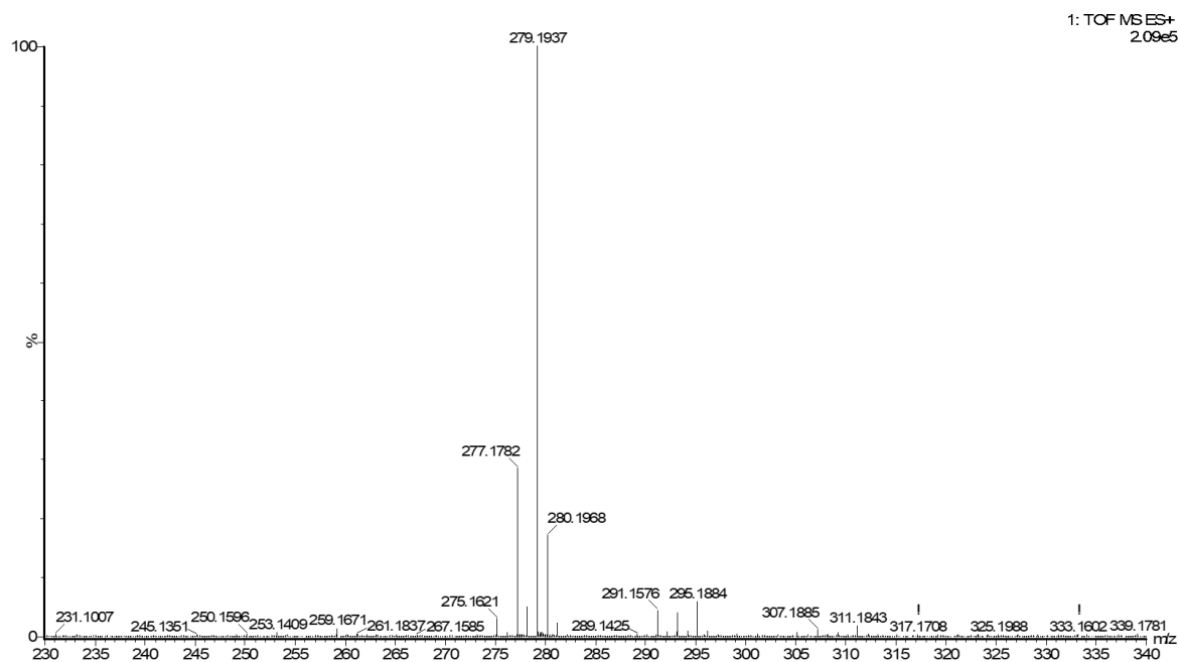

Figure S47. The HRESIMS spectroscopic data of compound 8.

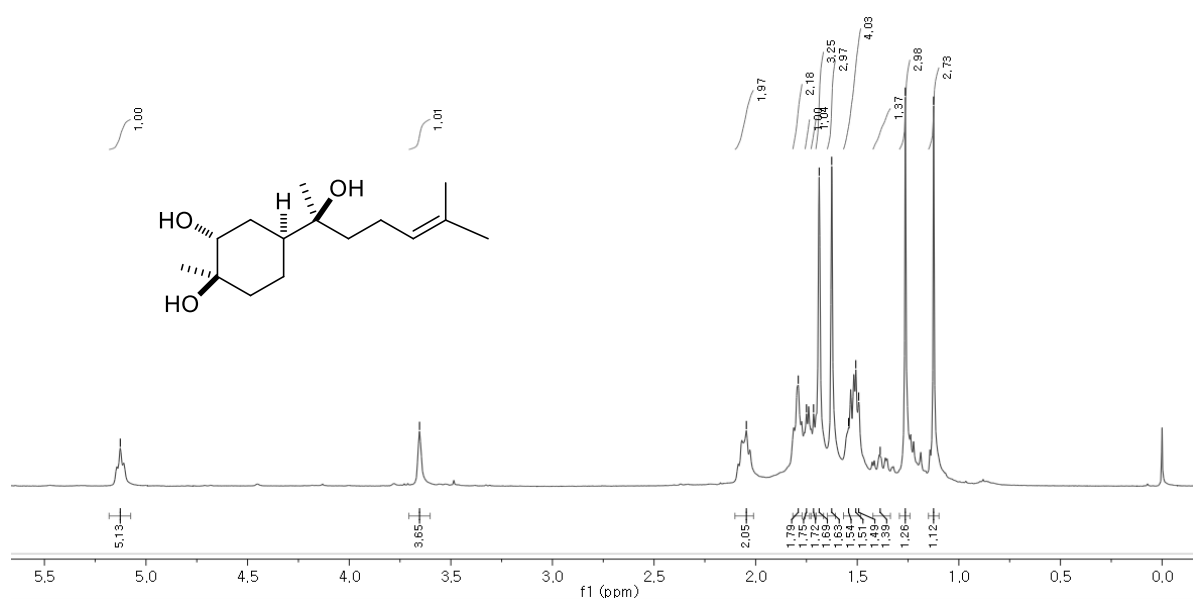

Figure S48.  $^1\text{H}$  NMR spectrum of compound 9 recorded at 400 MHz in  $\text{CDCl}_3$ .

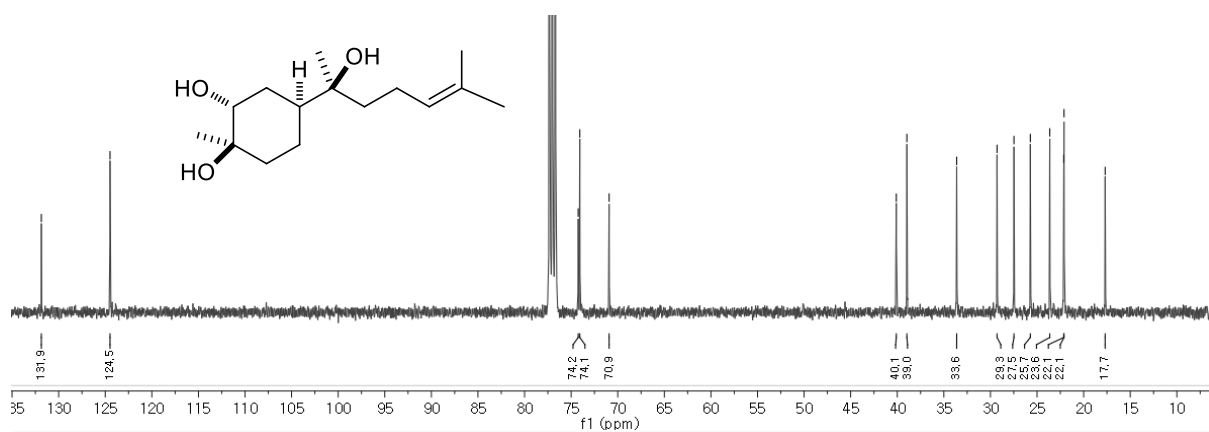

**Figure S49.**  $^{13}\text{C}$  NMR spectrum of compound **9** recorded at 100 MHz in  $\text{CDCl}_3$ .

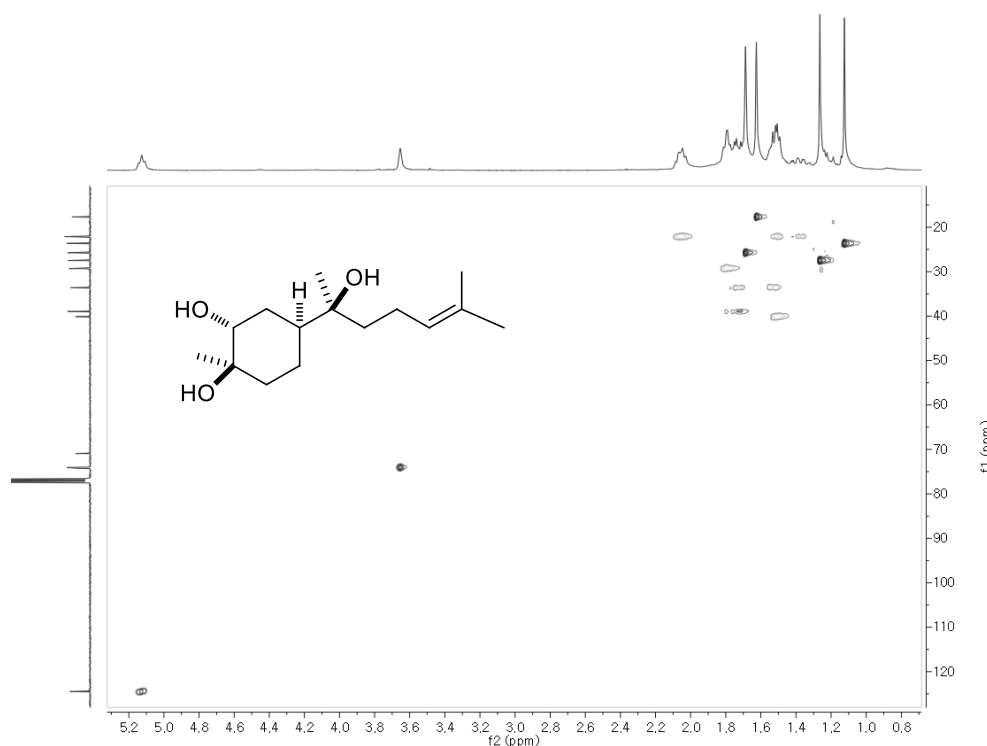

**Figure S50.** HSQC spectrum of compound **9** recorded at 400 MHz in  $\text{CDCl}_3$ .

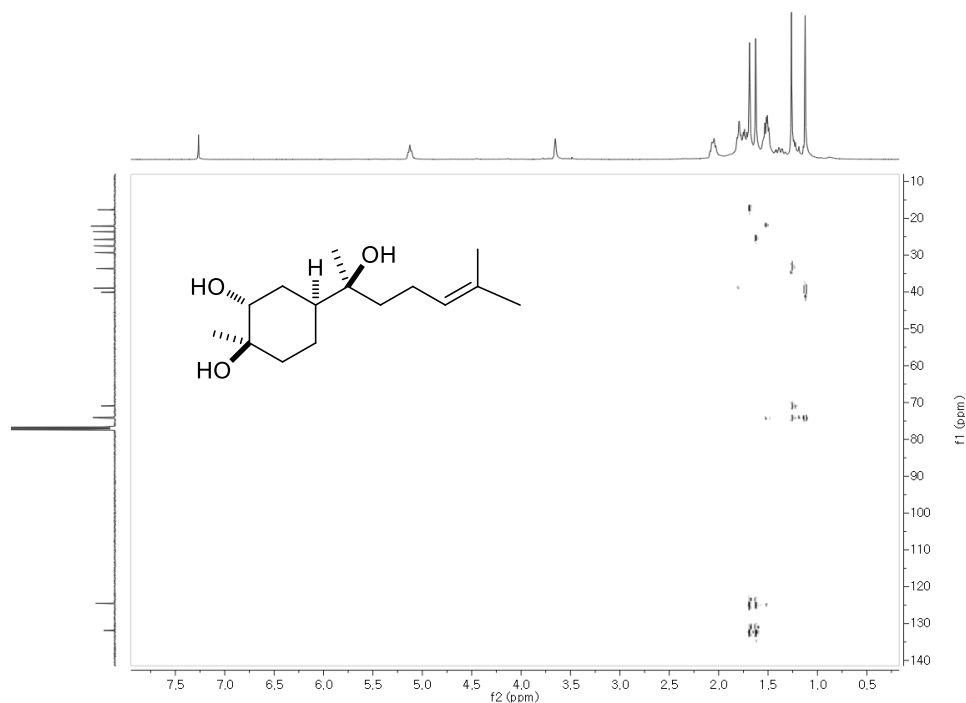

**Figure S51.** HMBC spectrum of compound **9** recorded at 400 MHz in  $\text{CDCl}_3$ .

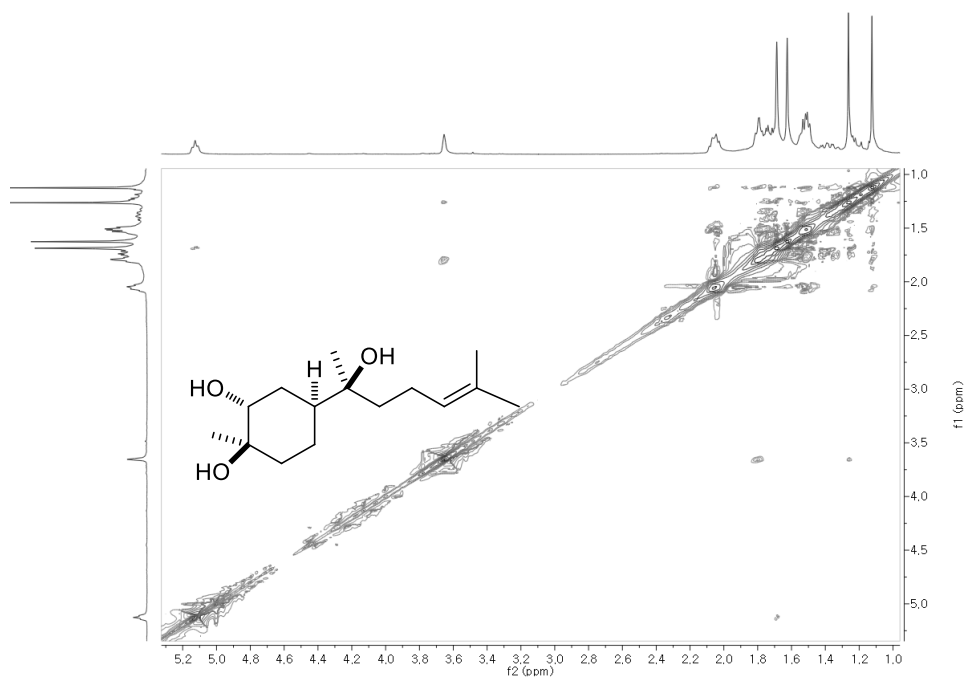

Figure S52. NOESY spectrum of compound **9** recorded at 400 MHz in CDCl<sub>3</sub>.

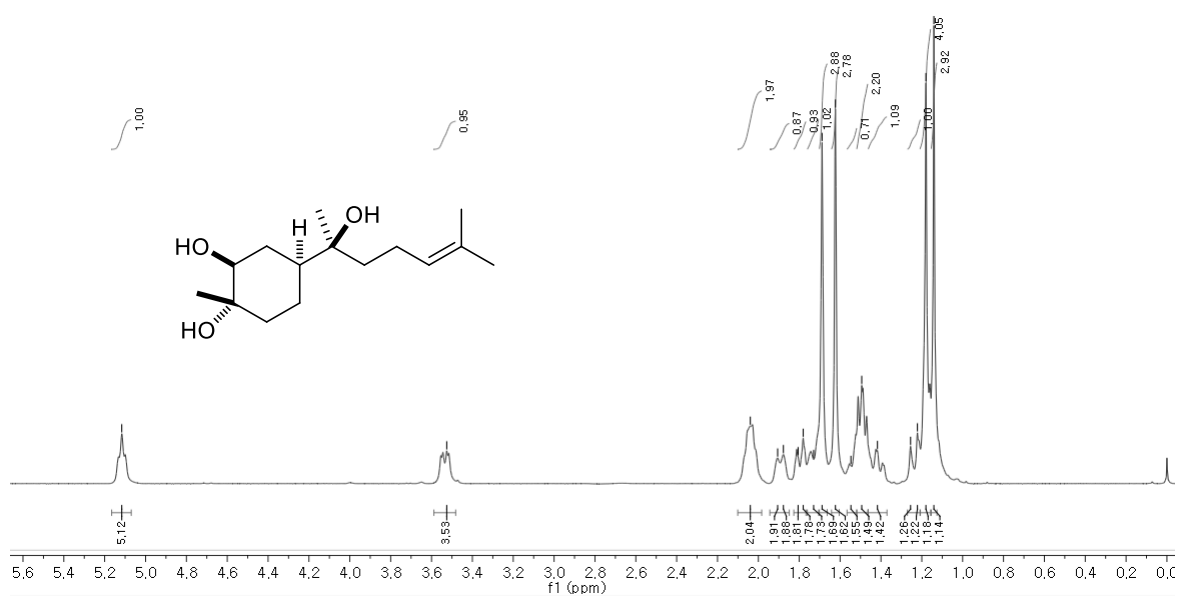

Figure S53. <sup>1</sup>H NMR spectrum of compound **10** recorded at 400 MHz in CDCl<sub>3</sub>.

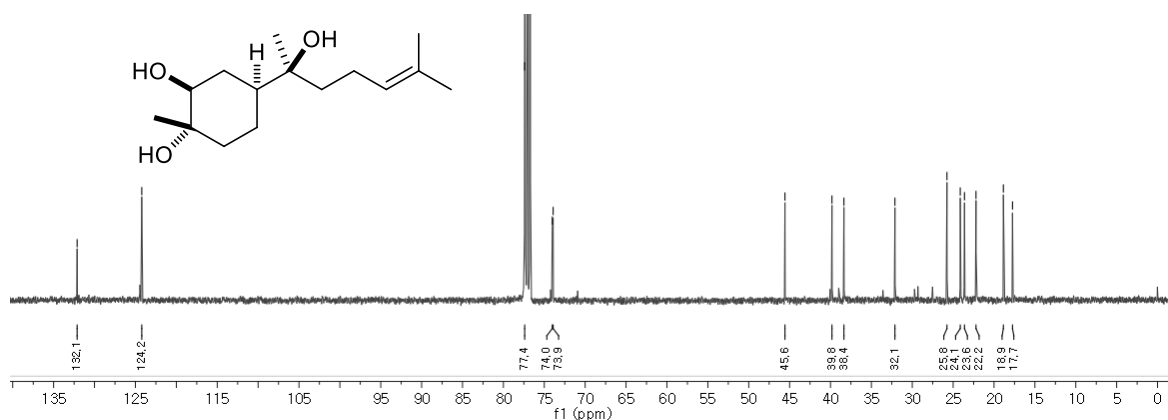

**Figure S54.**  $^{13}\text{C}$  NMR spectrum of compound **10** recorded at 100 MHz in  $\text{CDCl}_3$ .

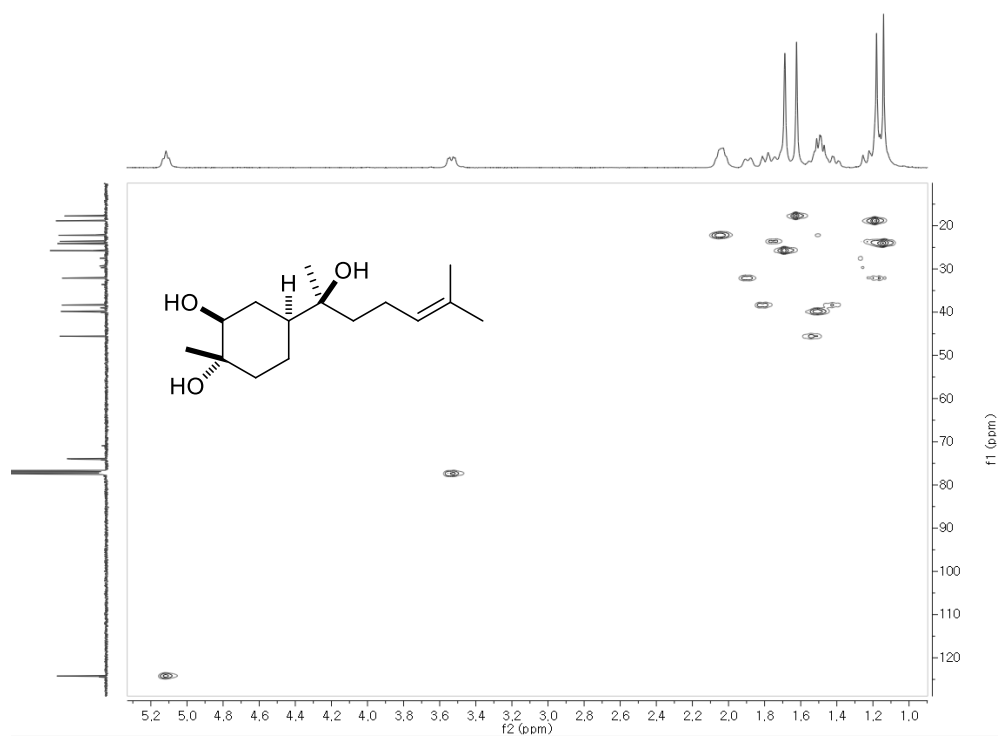

**Figure S55.** HSQC spectrum of compound **10** recorded at 400 MHz in  $\text{CDCl}_3$ .

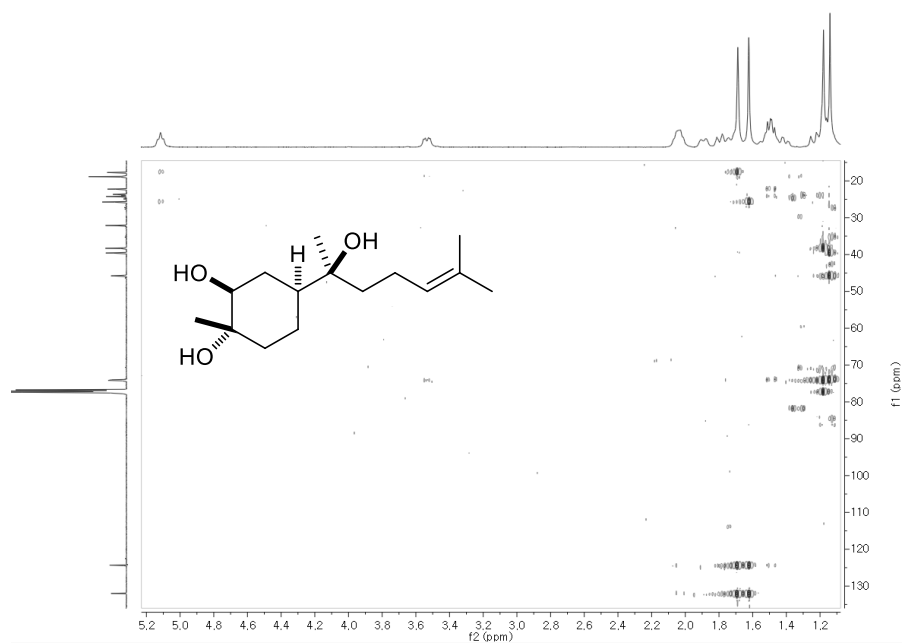

**Figure S56.** HMBC spectrum of compound **10** recorded at 400 MHz in  $\text{CDCl}_3$ .

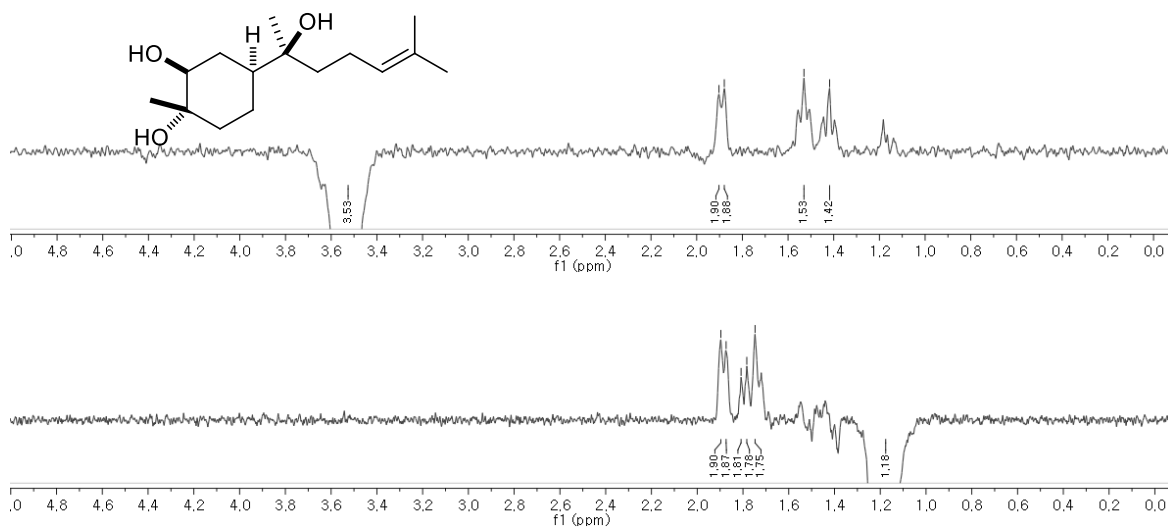

**Figure S57.** NOE spectrum of compound 10 recorded at 500 MHz in  $\text{CDCl}_3$ .

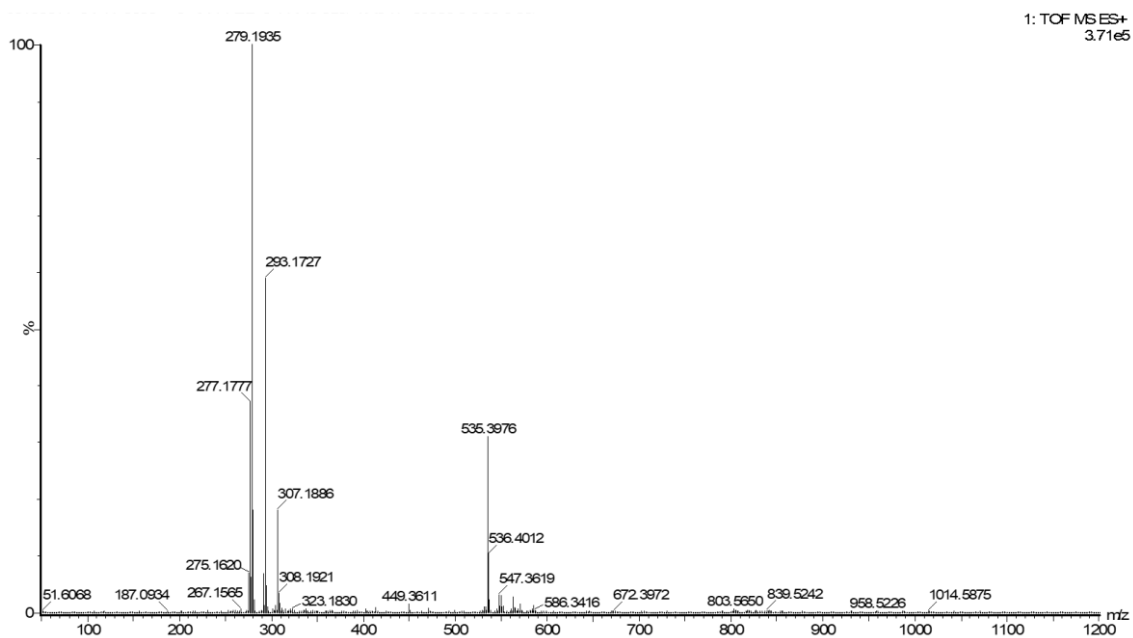

**Figure S58.** The HRESIMS spectroscopic data of compound 10.

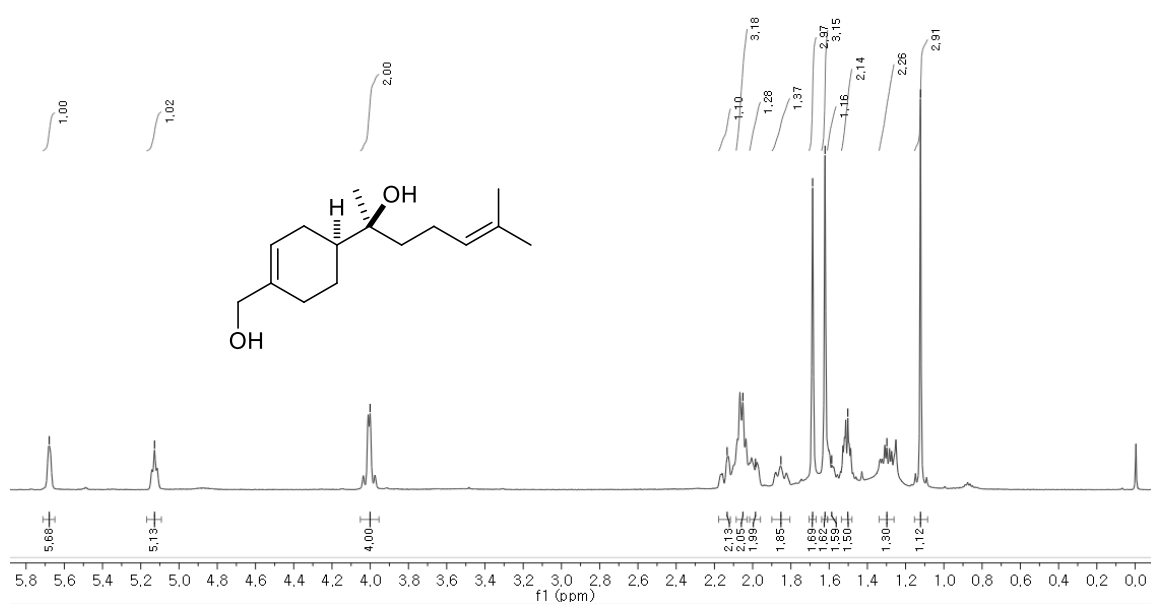

**Figure S59.**  $^1\text{H}$  NMR spectrum of compound **11** recorded at 400 MHz in  $\text{CDCl}_3$ .

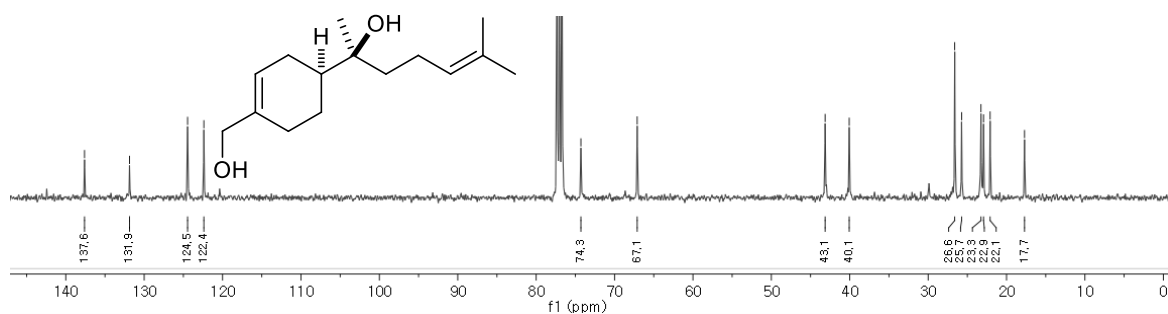

**Figure S60.**  $^{13}\text{C}$  NMR spectrum of compound **11** recorded at 100 MHz in  $\text{CDCl}_3$ .

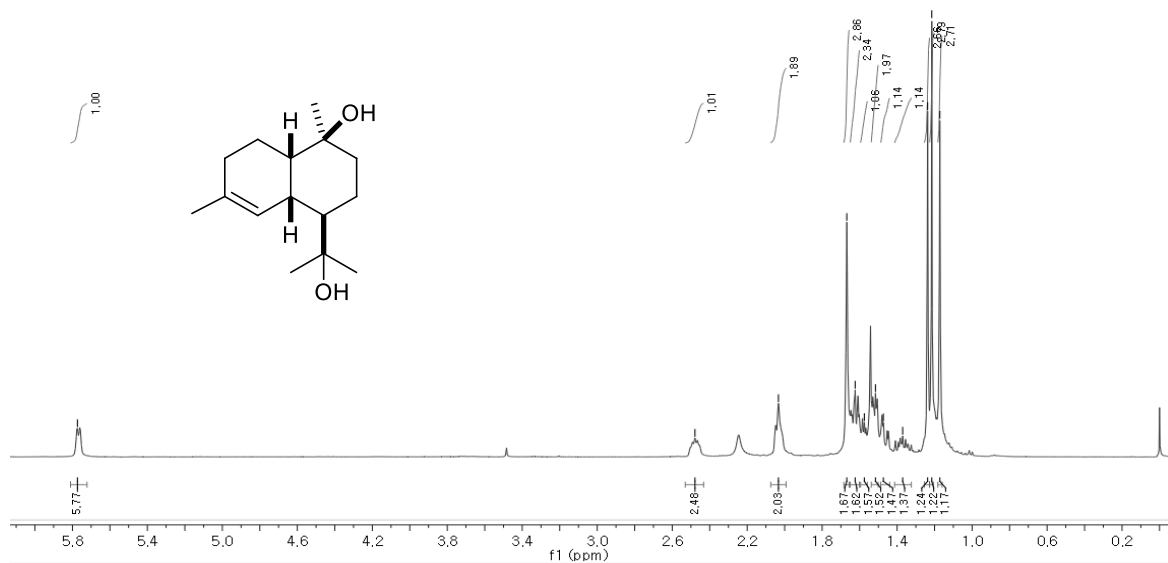

**Figure S61.**  $^1\text{H}$  NMR spectrum of compound **12** recorded at 400 MHz in  $\text{CDCl}_3$ .

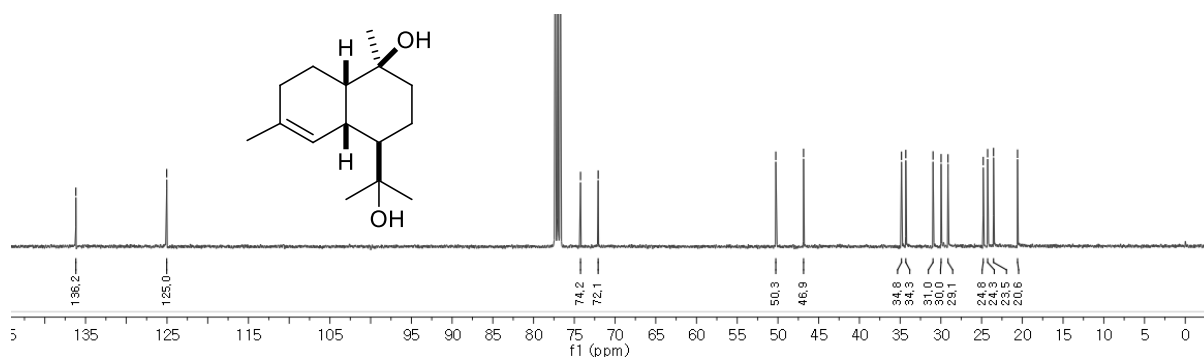

**Figure S62.**  $^{13}\text{C}$  NMR spectrum of compound **12** recorded at 100 MHz in  $\text{CDCl}_3$ .
